# Supplementary material
Source: publisher figshare collection journal article supplement (https://acs.figshare.com/ndownloader/files/4264705)
Supplement: Supplementary file 1 [file 4264705]

data_header

# 1. SUBMISSION DETAILS

_publ_contact_author
;
        Jeffrey R. Long
        Department of Chemistry
        University of California, Berkeley
        United States of America
;
_publ_contact_author_phone        '510 642-0860'
_publ_contact_author_fax          '510 642-8369'
_publ_contact_author_email        jrlong@berkeley.edu
_publ_requested_journal           
;
  'J. Am. Chem. Soc.'
;
_publ_requested_coeditor_name     ?

_publ_contact_letter
;
  This structure is part of a paper being 
 submitted to the Journal of the American
 Chemical Society.
;

#===END

# 3. TITLE AND AUTHOR LIST

_publ_section_title
;
A Radical-Bridged Terbium Complex Exhibiting Magnetic Hysteresis to 15 K
;

loop_
 _publ_author_name
 _publ_author_address

     'Rinehart, Jeffrey D.'
;     Department of Chemistry
      University of California, Berkeley
      United States of America
;
     'Fang, Ming'
;     Chemistry Division
      Los Alamos National Laboratory
      United States of America
;
      'Evans, William J.'
;     Department of Chemistry
      University of California, Berkeley
      United States of America
;
      'Long, Jeffrey R.'
;     Department of Chemistry
      University of California, Berkeley
      United States of America
;

#===END
 
data_mf84 
  
_audit_creation_method            SHELXTL 
_chemical_name_systematic 
; 
 ? 
; 
_chemical_name_common             ? 
_chemical_melting_point           ? 
_chemical_formula_moiety          ? 
_chemical_formula_sum 
 'C52 H128 K N6 O10 Si8 Tb2' 
_chemical_formula_weight          1579.26 
  
loop_ 
 _atom_type_symbol 
 _atom_type_description 
 _atom_type_scat_dispersion_real 
 _atom_type_scat_dispersion_imag 
 _atom_type_scat_source 
 'C'  'C'   0.0033   0.0016 
 'International Tables Vol C Tables 4.2.6.8 and 6.1.1.4' 
 'H'  'H'   0.0000   0.0000 
 'International Tables Vol C Tables 4.2.6.8 and 6.1.1.4' 
 'N'  'N'   0.0061   0.0033 
 'International Tables Vol C Tables 4.2.6.8 and 6.1.1.4' 
 'O'  'O'   0.0106   0.0060 
 'International Tables Vol C Tables 4.2.6.8 and 6.1.1.4' 
 'Si'  'Si'   0.0817   0.0704 
 'International Tables Vol C Tables 4.2.6.8 and 6.1.1.4' 
 'K'  'K'   0.2009   0.2494 
 'International Tables Vol C Tables 4.2.6.8 and 6.1.1.4' 
 'Tb'  'Tb'  -0.1723   4.1537 
 'International Tables Vol C Tables 4.2.6.8 and 6.1.1.4' 
  
_symmetry_cell_setting            Triclinic 
_symmetry_space_group_name_H-M    P-1 
  
loop_ 
 _symmetry_equiv_pos_as_xyz 
 'x, y, z' 
 '-x, -y, -z' 
  
_cell_length_a                    10.2704(4) 
_cell_length_b                    13.9728(6) 
_cell_length_c                    15.1455(6) 
_cell_angle_alpha                 83.3933(5) 
_cell_angle_beta                  74.0667(5) 
_cell_angle_gamma                 72.9371(5) 
_cell_volume                      1996.57(14) 
_cell_formula_units_Z             1 
_cell_measurement_temperature     173(2) 
_cell_measurement_reflns_used     9904 
_cell_measurement_theta_min       2.27 
_cell_measurement_theta_max       28.44 
  
_exptl_crystal_description        irregular 
_exptl_crystal_colour             orange 
_exptl_crystal_size_max           0.24 
_exptl_crystal_size_mid           0.20 
_exptl_crystal_size_min           0.20 
_exptl_crystal_density_meas       none 
_exptl_crystal_density_diffrn     1.313 
_exptl_crystal_density_method     'not measured' 
_exptl_crystal_F_000              823 
_exptl_absorpt_coefficient_mu     1.976 
_exptl_absorpt_correction_type    numerical 
_exptl_absorpt_correction_T_min   0.6463 
_exptl_absorpt_correction_T_max   0.6898 
_exptl_absorpt_process_details    'Bruker SADABS' 
  
_exptl_special_details 
; 
 ? 
; 
  
_diffrn_ambient_temperature       173(2) 
_diffrn_radiation_wavelength      0.71073 
_diffrn_radiation_type            MoK\a 
_diffrn_radiation_source          'fine-focus sealed tube' 
_diffrn_radiation_monochromator   graphite 
_diffrn_measurement_device_type   'Bruker APEX-II CCD' 
_diffrn_measurement_method        '\f and \w scans' 
_diffrn_detector_area_resol_mean  ? 
_diffrn_reflns_number             24276 
_diffrn_reflns_av_R_equivalents   0.0167 
_diffrn_reflns_av_sigmaI/netI     0.0212 
_diffrn_reflns_limit_h_min        -13 
_diffrn_reflns_limit_h_max        13 
_diffrn_reflns_limit_k_min        -18 
_diffrn_reflns_limit_k_max        18 
_diffrn_reflns_limit_l_min        -20 
_diffrn_reflns_limit_l_max        20 
_diffrn_reflns_theta_min          2.03 
_diffrn_reflns_theta_max          28.91 
_reflns_number_total              9604 
_reflns_number_gt                 8850 
_reflns_threshold_expression      >2sigma(I) 
  
_computing_data_collection        'Bruker APEX2' 
_computing_cell_refinement        'Bruker SAINT' 
_computing_data_reduction         'Bruker SAINT' 
_computing_structure_solution     'SHELXS-97 (Sheldrick, 2008)' 
_computing_structure_refinement   'SHELXL-97 (Sheldrick, 2008)' 
_computing_molecular_graphics     'Bruker SHELXTL' 
_computing_publication_material   'Bruker SHELXTL' 
  
_refine_special_details 
; 
 Refinement of F^2^ against ALL reflections.  The weighted R-factor wR and 
 goodness of fit S are based on F^2^, conventional R-factors R are based 
 on F, with F set to zero for negative F^2^. The threshold expression of 
 F^2^ > 2sigma(F^2^) is used only for calculating R-factors(gt) etc. and is 
 not relevant to the choice of reflections for refinement.  R-factors based 
 on F^2^ are statistically about twice as large as those based on F, and R- 
 factors based on ALL data will be even larger. 
; 
  
_refine_ls_structure_factor_coef  Fsqd 
_refine_ls_matrix_type            full 
_refine_ls_weighting_scheme       calc 
_refine_ls_weighting_details 
 'calc w=1/[\s^2^(Fo^2^)+(0.0266P)^2^+0.5034P] where P=(Fo^2^+2Fc^2^)/3' 
_atom_sites_solution_primary      direct 
_atom_sites_solution_secondary    difmap 
_atom_sites_solution_hydrogens    geom 
_refine_ls_hydrogen_treatment     constr 
_refine_ls_extinction_method      none 
_refine_ls_extinction_coef        ? 
_refine_ls_number_reflns          9604 
_refine_ls_number_parameters      370 
_refine_ls_number_restraints      0 
_refine_ls_R_factor_all           0.0232 
_refine_ls_R_factor_gt            0.0200 
_refine_ls_wR_factor_ref          0.0508 
_refine_ls_wR_factor_gt           0.0493 
_refine_ls_goodness_of_fit_ref    1.037 
_refine_ls_restrained_S_all       1.037 
_refine_ls_shift/su_max           0.001 
_refine_ls_shift/su_mean          0.000 
  
loop_ 
 _atom_site_label 
 _atom_site_type_symbol 
 _atom_site_fract_x 
 _atom_site_fract_y 
 _atom_site_fract_z 
 _atom_site_U_iso_or_equiv 
 _atom_site_adp_type 
 _atom_site_occupancy 
 _atom_site_symmetry_multiplicity 
 _atom_site_calc_flag 
 _atom_site_refinement_flags 
 _atom_site_disorder_assembly 
 _atom_site_disorder_group 
Tb1 Tb 0.564455(9) 0.407199(6) 0.108883(5) 0.02752(3) Uani 1 1 d . . . 
K1 K 1.0000 0.0000 0.5000 0.03888(13) Uani 1 2 d S . . 
Si1 Si 0.60649(6) 0.16876(4) 0.05209(4) 0.03821(12) Uani 1 1 d . . . 
Si2 Si 0.87846(6) 0.21979(4) 0.03719(4) 0.03829(12) Uani 1 1 d . . . 
Si3 Si 0.45134(6) 0.33542(4) 0.33895(4) 0.03715(12) Uani 1 1 d . . . 
Si4 Si 0.24444(6) 0.50415(4) 0.26133(4) 0.03794(12) Uani 1 1 d . . . 
O1 O 0.67587(15) 0.51364(11) 0.16692(10) 0.0419(3) Uani 1 1 d . . . 
O2 O 0.85996(16) 0.20052(11) 0.46567(11) 0.0491(4) Uani 1 1 d . . . 
O3 O 1.12514(16) 0.10745(12) 0.35163(10) 0.0484(4) Uani 1 1 d . . . 
O4 O 1.23203(15) -0.10185(12) 0.36734(11) 0.0485(4) Uani 1 1 d . . . 
O5 O 0.8535(2) -0.04123(19) 0.39343(15) 0.0848(7) Uani 1 1 d . . . 
N1 N 0.69988(17) 0.24727(11) 0.06182(11) 0.0340(3) Uani 1 1 d . . . 
N2 N 0.40133(16) 0.41520(12) 0.25392(10) 0.0324(3) Uani 1 1 d . . . 
N3 N 0.44697(16) 0.47652(11) 0.00520(10) 0.0320(3) Uani 1 1 d . . . 
C1 C 0.6316(3) 0.05166(18) 0.1288(2) 0.0632(7) Uani 1 1 d . . . 
H1A H 0.5676 0.0136 0.1240 0.095 Uiso 1 1 calc R . . 
H1B H 0.6111 0.0703 0.1927 0.095 Uiso 1 1 calc R . . 
H1C H 0.7291 0.0103 0.1097 0.095 Uiso 1 1 calc R . . 
C2 C 0.4135(2) 0.23381(17) 0.08707(16) 0.0474(5) Uani 1 1 d . . . 
H2A H 0.3598 0.1890 0.0798 0.071 Uiso 1 1 calc R . . 
H2B H 0.3927 0.2945 0.0482 0.071 Uiso 1 1 calc R . . 
H2C H 0.3871 0.2519 0.1515 0.071 Uiso 1 1 calc R . . 
C3 C 0.6444(3) 0.1249(2) -0.06724(18) 0.0630(7) Uani 1 1 d . . . 
H3C H 0.5784 0.0872 -0.0690 0.095 Uiso 1 1 calc R . . 
H3D H 0.7410 0.0816 -0.0848 0.095 Uiso 1 1 calc R . . 
H3E H 0.6336 0.1829 -0.1103 0.095 Uiso 1 1 calc R . . 
C4 C 0.9621(3) 0.10557(18) 0.10090(17) 0.0561(6) Uani 1 1 d . . . 
H4A H 0.9204 0.1129 0.1671 0.084 Uiso 1 1 calc R . . 
H4B H 1.0635 0.0977 0.0875 0.084 Uiso 1 1 calc R . . 
H4C H 0.9460 0.0464 0.0815 0.084 Uiso 1 1 calc R . . 
C5 C 0.9698(3) 0.1986(2) -0.08710(16) 0.0563(6) Uani 1 1 d . . . 
H5A H 0.9375 0.1487 -0.1093 0.084 Uiso 1 1 calc R . . 
H5B H 1.0718 0.1743 -0.0943 0.084 Uiso 1 1 calc R . . 
H5C H 0.9481 0.2618 -0.1228 0.084 Uiso 1 1 calc R . . 
C6 C 0.9336(3) 0.3260(2) 0.0670(2) 0.0628(7) Uani 1 1 d . . . 
H6A H 0.8968 0.3370 0.1330 0.094 Uiso 1 1 calc R . . 
H6B H 0.8962 0.3870 0.0326 0.094 Uiso 1 1 calc R . . 
H6C H 1.0366 0.3097 0.0509 0.094 Uiso 1 1 calc R . . 
C7 C 0.6443(2) 0.26902(18) 0.30195(15) 0.0478(5) Uani 1 1 d . . . 
H7A H 0.6624 0.2300 0.2479 0.072 Uiso 1 1 calc R . . 
H7B H 0.6724 0.2240 0.3521 0.072 Uiso 1 1 calc R . . 
H7C H 0.6987 0.3184 0.2865 0.072 Uiso 1 1 calc R . . 
C8 C 0.4260(3) 0.3947(2) 0.45055(16) 0.0643(7) Uani 1 1 d . . . 
H8A H 0.4648 0.4526 0.4380 0.096 Uiso 1 1 calc R . . 
H8B H 0.4747 0.3457 0.4907 0.096 Uiso 1 1 calc R . . 
H8C H 0.3253 0.4168 0.4809 0.096 Uiso 1 1 calc R . . 
C9 C 0.3620(3) 0.2324(2) 0.3710(2) 0.0687(8) Uani 1 1 d . . . 
H9A H 0.3758 0.1960 0.3161 0.103 Uiso 1 1 calc R . . 
H9B H 0.2611 0.2613 0.3972 0.103 Uiso 1 1 calc R . . 
H9C H 0.4024 0.1862 0.4165 0.103 Uiso 1 1 calc R . . 
C10 C 0.2792(3) 0.62904(17) 0.22445(17) 0.0523(6) Uani 1 1 d . . . 
H10A H 0.3279 0.6289 0.1590 0.078 Uiso 1 1 calc R . . 
H10B H 0.3381 0.6419 0.2603 0.078 Uiso 1 1 calc R . . 
H10C H 0.1896 0.6816 0.2347 0.078 Uiso 1 1 calc R . . 
C11 C 0.1201(3) 0.5182(2) 0.37942(16) 0.0624(7) Uani 1 1 d . . . 
H11A H 0.1018 0.4537 0.4022 0.094 Uiso 1 1 calc R . . 
H11B H 0.0313 0.5680 0.3763 0.094 Uiso 1 1 calc R . . 
H11C H 0.1624 0.5404 0.4212 0.094 Uiso 1 1 calc R . . 
C12 C 0.1412(2) 0.4806(2) 0.18554(18) 0.0554(6) Uani 1 1 d . . . 
H12A H 0.1973 0.4779 0.1216 0.083 Uiso 1 1 calc R . . 
H12B H 0.0539 0.5348 0.1910 0.083 Uiso 1 1 calc R . . 
H12C H 0.1185 0.4167 0.2044 0.083 Uiso 1 1 calc R . . 
C13 C 0.6737(3) 0.5290(2) 0.25937(17) 0.0633(7) Uani 1 1 d . . . 
H13A H 0.7481 0.4754 0.2798 0.076 Uiso 1 1 calc R . . 
H13B H 0.5815 0.5273 0.3012 0.076 Uiso 1 1 calc R . . 
C14 C 0.6986(3) 0.6289(2) 0.26109(19) 0.0623(7) Uani 1 1 d . . . 
H14A H 0.6239 0.6706 0.3088 0.075 Uiso 1 1 calc R . . 
H14B H 0.7911 0.6212 0.2734 0.075 Uiso 1 1 calc R . . 
C15 C 0.6954(4) 0.6746(2) 0.1673(2) 0.0757(9) Uani 1 1 d . . . 
H15A H 0.7618 0.7165 0.1468 0.091 Uiso 1 1 calc R . . 
H15B H 0.5995 0.7163 0.1659 0.091 Uiso 1 1 calc R . . 
C16 C 0.7394(3) 0.5858(2) 0.10830(18) 0.0637(7) Uani 1 1 d . . . 
H16A H 0.7039 0.6034 0.0524 0.076 Uiso 1 1 calc R . . 
H16B H 0.8433 0.5595 0.0899 0.076 Uiso 1 1 calc R . . 
C17 C 0.7723(3) 0.25289(19) 0.5456(2) 0.0606(7) Uani 1 1 d . . . 
H17A H 0.7131 0.3180 0.5277 0.073 Uiso 1 1 calc R . . 
H17B H 0.8309 0.2659 0.5825 0.073 Uiso 1 1 calc R . . 
C18 C 0.9489(3) 0.25536(19) 0.4080(2) 0.0604(7) Uani 1 1 d . . . 
H18A H 1.0131 0.2672 0.4413 0.072 Uiso 1 1 calc R . . 
H18B H 0.8917 0.3211 0.3898 0.072 Uiso 1 1 calc R . . 
C19 C 1.0325(3) 0.1967(2) 0.32458(19) 0.0631(7) Uani 1 1 d . . . 
H19A H 0.9685 0.1797 0.2944 0.076 Uiso 1 1 calc R . . 
H19B H 1.0875 0.2371 0.2802 0.076 Uiso 1 1 calc R . . 
C20 C 1.2105(3) 0.0483(2) 0.27566(16) 0.0577(6) Uani 1 1 d . . . 
H20A H 1.2634 0.0886 0.2296 0.069 Uiso 1 1 calc R . . 
H20B H 1.1508 0.0252 0.2462 0.069 Uiso 1 1 calc R . . 
C21 C 1.3102(2) -0.0394(2) 0.30917(16) 0.0547(6) Uani 1 1 d . . . 
H21A H 1.3780 -0.0774 0.2564 0.066 Uiso 1 1 calc R . . 
H21B H 1.3638 -0.0163 0.3437 0.066 Uiso 1 1 calc R . . 
C22 C 1.3182(2) -0.19019(19) 0.3997(2) 0.0608(7) Uani 1 1 d . . . 
H22A H 1.3709 -0.1727 0.4383 0.073 Uiso 1 1 calc R . . 
H22B H 1.3870 -0.2278 0.3471 0.073 Uiso 1 1 calc R . . 
C23 C 0.7085(4) -0.0304(3) 0.4199(3) 0.1080(14) Uani 1 1 d . . . 
H23A H 0.6565 0.0369 0.4008 0.130 Uiso 1 1 calc R . . 
H23B H 0.6760 -0.0392 0.4874 0.130 Uiso 1 1 calc R . . 
C24 C 0.6848(4) -0.1100(4) 0.3728(3) 0.1148(16) Uani 1 1 d . . . 
H24A H 0.6265 -0.1485 0.4168 0.138 Uiso 1 1 calc R . . 
H24B H 0.6384 -0.0807 0.3228 0.138 Uiso 1 1 calc R . . 
C25 C 0.8272(5) -0.1731(3) 0.3363(3) 0.1132(15) Uani 1 1 d . . . 
H25A H 0.8558 -0.2267 0.3815 0.136 Uiso 1 1 calc R . . 
H25B H 0.8346 -0.2038 0.2787 0.136 Uiso 1 1 calc R . . 
C26 C 0.9119(4) -0.1029(3) 0.3194(2) 0.0862(10) Uani 1 1 d . . . 
H26A H 1.0117 -0.1383 0.3166 0.103 Uiso 1 1 calc R . . 
H26B H 0.9066 -0.0639 0.2610 0.103 Uiso 1 1 calc R . . 
  
loop_ 
 _atom_site_aniso_label 
 _atom_site_aniso_U_11 
 _atom_site_aniso_U_22 
 _atom_site_aniso_U_33 
 _atom_site_aniso_U_23 
 _atom_site_aniso_U_13 
 _atom_site_aniso_U_12 
Tb1 0.03118(5) 0.02652(5) 0.02467(5) -0.00096(3) -0.00615(3) -0.00849(3) 
K1 0.0367(3) 0.0418(3) 0.0374(3) -0.0089(2) -0.0044(2) -0.0115(3) 
Si1 0.0468(3) 0.0309(3) 0.0384(3) -0.0028(2) -0.0119(2) -0.0112(2) 
Si2 0.0369(3) 0.0352(3) 0.0388(3) -0.0045(2) -0.0091(2) -0.0032(2) 
Si3 0.0409(3) 0.0460(3) 0.0279(3) 0.0039(2) -0.0108(2) -0.0170(2) 
Si4 0.0337(3) 0.0420(3) 0.0329(3) -0.0032(2) -0.0025(2) -0.0074(2) 
O1 0.0497(8) 0.0450(8) 0.0399(8) -0.0001(6) -0.0141(6) -0.0245(7) 
O2 0.0479(9) 0.0438(8) 0.0598(10) -0.0045(7) -0.0196(7) -0.0124(7) 
O3 0.0489(9) 0.0595(10) 0.0398(8) 0.0027(7) -0.0125(7) -0.0202(7) 
O4 0.0333(7) 0.0615(10) 0.0494(9) -0.0139(7) -0.0052(6) -0.0112(7) 
O5 0.0738(14) 0.1192(18) 0.0764(14) -0.0452(13) -0.0104(11) -0.0416(13) 
N1 0.0386(8) 0.0304(8) 0.0325(8) -0.0013(6) -0.0098(7) -0.0076(7) 
N2 0.0329(8) 0.0361(8) 0.0277(7) -0.0008(6) -0.0057(6) -0.0108(6) 
N3 0.0338(8) 0.0329(8) 0.0321(8) 0.0007(6) -0.0083(6) -0.0141(6) 
C1 0.0745(18) 0.0388(12) 0.0802(19) 0.0148(12) -0.0275(15) -0.0206(12) 
C2 0.0470(12) 0.0454(12) 0.0527(13) -0.0005(10) -0.0130(10) -0.0171(10) 
C3 0.0713(17) 0.0704(17) 0.0545(15) -0.0229(13) -0.0104(13) -0.0276(14) 
C4 0.0549(14) 0.0514(14) 0.0571(14) -0.0018(11) -0.0238(12) 0.0014(11) 
C5 0.0466(13) 0.0638(15) 0.0451(13) -0.0034(11) -0.0018(10) -0.0038(11) 
C6 0.0462(13) 0.0578(15) 0.0843(19) -0.0178(14) -0.0055(13) -0.0186(12) 
C7 0.0484(12) 0.0540(13) 0.0410(11) 0.0048(10) -0.0184(10) -0.0097(10) 
C8 0.0680(17) 0.090(2) 0.0333(12) -0.0091(12) -0.0158(11) -0.0133(15) 
C9 0.0793(19) 0.0729(18) 0.0689(17) 0.0301(14) -0.0303(15) -0.0452(16) 
C10 0.0587(14) 0.0400(12) 0.0517(13) -0.0023(10) -0.0107(11) -0.0067(10) 
C11 0.0518(14) 0.0701(17) 0.0450(13) -0.0018(12) 0.0078(11) -0.0050(12) 
C12 0.0358(11) 0.0678(16) 0.0620(15) -0.0081(12) -0.0153(11) -0.0085(11) 
C13 0.092(2) 0.0722(17) 0.0487(14) 0.0030(12) -0.0301(14) -0.0471(16) 
C14 0.0597(15) 0.0622(16) 0.0688(17) -0.0259(13) -0.0088(13) -0.0204(13) 
C15 0.092(2) 0.0473(15) 0.103(2) 0.0051(15) -0.0364(19) -0.0334(15) 
C16 0.089(2) 0.0728(17) 0.0520(14) 0.0110(12) -0.0221(13) -0.0582(16) 
C17 0.0512(14) 0.0444(13) 0.0844(19) -0.0173(12) -0.0174(13) -0.0047(11) 
C18 0.0588(15) 0.0472(13) 0.0802(19) 0.0089(13) -0.0261(14) -0.0185(12) 
C19 0.0646(16) 0.0700(17) 0.0592(16) 0.0156(13) -0.0225(13) -0.0255(14) 
C20 0.0573(15) 0.0828(18) 0.0363(11) -0.0001(11) -0.0065(10) -0.0301(13) 
C21 0.0388(12) 0.0833(18) 0.0412(12) -0.0142(12) 0.0023(9) -0.0227(12) 
C22 0.0378(12) 0.0568(15) 0.0812(18) -0.0222(13) -0.0074(12) -0.0028(11) 
C23 0.076(2) 0.081(2) 0.132(4) -0.006(2) 0.013(2) -0.0045(19) 
C24 0.091(3) 0.204(5) 0.089(3) 0.034(3) -0.043(2) -0.097(3) 
C25 0.137(4) 0.127(3) 0.094(3) -0.037(3) 0.006(3) -0.084(3) 
C26 0.077(2) 0.115(3) 0.077(2) -0.036(2) -0.0108(17) -0.038(2) 
  
_geom_special_details 
; 
 All esds (except the esd in the dihedral angle between two l.s. planes) 
 are estimated using the full covariance matrix.  The cell esds are taken 
 into account individually in the estimation of esds in distances, angles 
 and torsion angles; correlations between esds in cell parameters are only 
 used when they are defined by crystal symmetry.  An approximate (isotropic) 
 treatment of cell esds is used for estimating esds involving l.s. planes. 
; 
  
loop_ 
 _geom_bond_atom_site_label_1 
 _geom_bond_atom_site_label_2 
 _geom_bond_distance 
 _geom_bond_site_symmetry_2 
 _geom_bond_publ_flag 
Tb1 N3 2.2056(15) . ? 
Tb1 N3 2.2345(15) 2_665 ? 
Tb1 N1 2.3312(15) . ? 
Tb1 N2 2.3602(15) . ? 
Tb1 O1 2.4791(13) . ? 
K1 O5 2.6939(19) . ? 
K1 O5 2.6940(19) 2_756 ? 
K1 O3 2.7796(15) 2_756 ? 
K1 O3 2.7796(15) . ? 
K1 O4 2.7893(14) 2_756 ? 
K1 O4 2.7893(14) . ? 
K1 O2 2.8107(15) . ? 
K1 O2 2.8107(15) 2_756 ? 
Si1 N1 1.6962(17) . ? 
Si1 C2 1.874(2) . ? 
Si1 C3 1.877(2) . ? 
Si1 C1 1.891(2) . ? 
Si2 N1 1.7013(17) . ? 
Si2 C5 1.873(2) . ? 
Si2 C4 1.874(2) . ? 
Si2 C6 1.875(3) . ? 
Si3 N2 1.6917(16) . ? 
Si3 C9 1.876(3) . ? 
Si3 C7 1.880(2) . ? 
Si3 C8 1.888(2) . ? 
Si4 N2 1.7063(17) . ? 
Si4 C12 1.874(2) . ? 
Si4 C10 1.875(2) . ? 
Si4 C11 1.884(2) . ? 
O1 C13 1.434(3) . ? 
O1 C16 1.447(3) . ? 
O2 C18 1.415(3) . ? 
O2 C17 1.425(3) . ? 
O3 C20 1.420(3) . ? 
O3 C19 1.424(3) . ? 
O4 C22 1.416(3) . ? 
O4 C21 1.425(3) . ? 
O5 C26 1.382(3) . ? 
O5 C23 1.398(4) . ? 
N3 N3 1.394(3) 2_665 ? 
N3 Tb1 2.2345(15) 2_665 ? 
C13 C14 1.496(3) . ? 
C14 C15 1.494(4) . ? 
C15 C16 1.499(4) . ? 
C17 C22 1.485(4) 2_756 ? 
C18 C19 1.495(4) . ? 
C20 C21 1.487(4) . ? 
C22 C17 1.485(4) 2_756 ? 
C23 C24 1.497(6) . ? 
C24 C25 1.460(6) . ? 
C25 C26 1.452(5) . ? 
  
loop_ 
 _geom_angle_atom_site_label_1 
 _geom_angle_atom_site_label_2 
 _geom_angle_atom_site_label_3 
 _geom_angle 
 _geom_angle_site_symmetry_1 
 _geom_angle_site_symmetry_3 
 _geom_angle_publ_flag 
N3 Tb1 N3 36.59(7) . 2_665 ? 
N3 Tb1 N1 107.85(6) . . ? 
N3 Tb1 N1 114.36(6) 2_665 . ? 
N3 Tb1 N2 108.09(5) . . ? 
N3 Tb1 N2 126.10(6) 2_665 . ? 
N1 Tb1 N2 115.96(5) . . ? 
N3 Tb1 O1 116.94(5) . . ? 
N3 Tb1 O1 84.24(5) 2_665 . ? 
N1 Tb1 O1 118.28(5) . . ? 
N2 Tb1 O1 88.44(5) . . ? 
O5 K1 O5 180.00(6) . 2_756 ? 
O5 K1 O3 91.35(6) . 2_756 ? 
O5 K1 O3 88.65(6) 2_756 2_756 ? 
O5 K1 O3 88.65(6) . . ? 
O5 K1 O3 91.35(6) 2_756 . ? 
O3 K1 O3 179.999(1) 2_756 . ? 
O5 K1 O4 96.68(5) . 2_756 ? 
O5 K1 O4 83.32(5) 2_756 2_756 ? 
O3 K1 O4 60.68(5) 2_756 2_756 ? 
O3 K1 O4 119.32(5) . 2_756 ? 
O5 K1 O4 83.32(5) . . ? 
O5 K1 O4 96.68(5) 2_756 . ? 
O3 K1 O4 119.32(5) 2_756 . ? 
O3 K1 O4 60.68(5) . . ? 
O4 K1 O4 180.00(8) 2_756 . ? 
O5 K1 O2 84.23(6) . . ? 
O5 K1 O2 95.77(6) 2_756 . ? 
O3 K1 O2 119.43(5) 2_756 . ? 
O3 K1 O2 60.57(5) . . ? 
O4 K1 O2 60.00(5) 2_756 . ? 
O4 K1 O2 120.00(5) . . ? 
O5 K1 O2 95.77(6) . 2_756 ? 
O5 K1 O2 84.23(6) 2_756 2_756 ? 
O3 K1 O2 60.57(5) 2_756 2_756 ? 
O3 K1 O2 119.43(5) . 2_756 ? 
O4 K1 O2 120.00(5) 2_756 2_756 ? 
O4 K1 O2 60.00(5) . 2_756 ? 
O2 K1 O2 180.00(4) . 2_756 ? 
N1 Si1 C2 109.61(9) . . ? 
N1 Si1 C3 114.34(10) . . ? 
C2 Si1 C3 106.72(12) . . ? 
N1 Si1 C1 114.27(11) . . ? 
C2 Si1 C1 105.31(12) . . ? 
C3 Si1 C1 105.95(13) . . ? 
N1 Si2 C5 114.56(10) . . ? 
N1 Si2 C4 113.98(10) . . ? 
C5 Si2 C4 105.45(11) . . ? 
N1 Si2 C6 110.58(10) . . ? 
C5 Si2 C6 105.03(13) . . ? 
C4 Si2 C6 106.54(13) . . ? 
N2 Si3 C9 114.39(10) . . ? 
N2 Si3 C7 110.21(9) . . ? 
C9 Si3 C7 104.73(13) . . ? 
N2 Si3 C8 115.62(11) . . ? 
C9 Si3 C8 105.39(14) . . ? 
C7 Si3 C8 105.58(11) . . ? 
N2 Si4 C12 112.93(10) . . ? 
N2 Si4 C10 108.92(10) . . ? 
C12 Si4 C10 107.37(12) . . ? 
N2 Si4 C11 115.27(10) . . ? 
C12 Si4 C11 105.00(12) . . ? 
C10 Si4 C11 106.91(12) . . ? 
C13 O1 C16 107.10(17) . . ? 
C13 O1 Tb1 129.94(13) . . ? 
C16 O1 Tb1 122.34(13) . . ? 
C18 O2 C17 112.51(19) . . ? 
C18 O2 K1 113.74(14) . . ? 
C17 O2 K1 114.54(14) . . ? 
C20 O3 C19 112.28(19) . . ? 
C20 O3 K1 114.14(14) . . ? 
C19 O3 K1 114.97(14) . . ? 
C22 O4 C21 113.21(18) . . ? 
C22 O4 K1 115.27(14) . . ? 
C21 O4 K1 114.37(13) . . ? 
C26 O5 C23 108.2(3) . . ? 
C26 O5 K1 124.60(19) . . ? 
C23 O5 K1 124.5(2) . . ? 
Si1 N1 Si2 125.79(10) . . ? 
Si3 N2 Si4 127.03(9) . . ? 
Si3 N2 Tb1 117.78(8) . . ? 
Si4 N2 Tb1 115.18(8) . . ? 
N3 N3 Tb1 72.83(12) 2_665 . ? 
N3 N3 Tb1 70.58(12) 2_665 2_665 ? 
Tb1 N3 Tb1 143.41(7) . 2_665 ? 
O1 C13 C14 107.9(2) . . ? 
C15 C14 C13 104.4(2) . . ? 
C14 C15 C16 103.6(2) . . ? 
O1 C16 C15 103.7(2) . . ? 
O2 C17 C22 108.3(2) . 2_756 ? 
O2 C18 C19 108.8(2) . . ? 
O3 C19 C18 108.8(2) . . ? 
O3 C20 C21 108.66(19) . . ? 
O4 C21 C20 108.75(19) . . ? 
O4 C22 C17 109.0(2) . 2_756 ? 
O5 C23 C24 106.2(3) . . ? 
C25 C24 C23 103.2(3) . . ? 
C26 C25 C24 102.9(3) . . ? 
O5 C26 C25 104.3(3) . . ? 
  
_diffrn_measured_fraction_theta_max    0.914 
_diffrn_reflns_theta_full              25.50 
_diffrn_measured_fraction_theta_full   0.998 
_refine_diff_density_max    0.637 
_refine_diff_density_min   -0.446 
_refine_diff_density_rms    0.057 


#===END
 
data_mf82 
  
_audit_creation_method            SHELXTL 
_chemical_name_systematic 
; 
 ? 
; 
_chemical_name_common             ? 
_chemical_melting_point           ? 
_chemical_formula_moiety          ? 
_chemical_formula_sum 
 'C60 H144 Ho2 K N6 O12 Si8' 
_chemical_formula_weight          1735.49 
  
loop_ 
 _atom_type_symbol 
 _atom_type_description 
 _atom_type_scat_dispersion_real 
 _atom_type_scat_dispersion_imag 
 _atom_type_scat_source 
 'C'  'C'   0.0033   0.0016 
 'International Tables Vol C Tables 4.2.6.8 and 6.1.1.4' 
 'H'  'H'   0.0000   0.0000 
 'International Tables Vol C Tables 4.2.6.8 and 6.1.1.4' 
 'N'  'N'   0.0061   0.0033 
 'International Tables Vol C Tables 4.2.6.8 and 6.1.1.4' 
 'O'  'O'   0.0106   0.0060 
 'International Tables Vol C Tables 4.2.6.8 and 6.1.1.4' 
 'Si'  'Si'   0.0817   0.0704 
 'International Tables Vol C Tables 4.2.6.8 and 6.1.1.4' 
 'K'  'K'   0.2009   0.2494 
 'International Tables Vol C Tables 4.2.6.8 and 6.1.1.4' 
 'Ho'  'Ho'  -0.2175   4.6783 
 'International Tables Vol C Tables 4.2.6.8 and 6.1.1.4' 
  
_symmetry_cell_setting            Triclinic 
_symmetry_space_group_name_H-M    P-1 
  
loop_ 
 _symmetry_equiv_pos_as_xyz 
 'x, y, z' 
 '-x, -y, -z' 
  
_cell_length_a                    10.4651(7) 
_cell_length_b                    13.7377(9) 
_cell_length_c                    16.9780(12) 
_cell_angle_alpha                 70.4515(7) 
_cell_angle_beta                  77.2633(8) 
_cell_angle_gamma                 70.8475(7) 
_cell_volume                      2156.0(3) 
_cell_formula_units_Z             1 
_cell_measurement_temperature     143(2) 
_cell_measurement_reflns_used     9939 
_cell_measurement_theta_min       2.26 
_cell_measurement_theta_max       27.89 
  
_exptl_crystal_description        irregular 
_exptl_crystal_colour             orange 
_exptl_crystal_size_max           0.22 
_exptl_crystal_size_mid           0.19 
_exptl_crystal_size_min           0.15 
_exptl_crystal_density_meas       none 
_exptl_crystal_density_diffrn     1.337 
_exptl_crystal_density_method     'not measured' 
_exptl_crystal_F_000              907 
_exptl_absorpt_coefficient_mu     2.032 
_exptl_absorpt_correction_type    numerical 
_exptl_absorpt_correction_T_min   0.6577 
_exptl_absorpt_correction_T_max   0.7543 
_exptl_absorpt_process_details    'Bruker SADABS' 
  
_exptl_special_details 
; 
 ? 
; 
  
_diffrn_ambient_temperature       143(2) 
_diffrn_radiation_wavelength      0.71073 
_diffrn_radiation_type            MoK\a 
_diffrn_radiation_source          'fine-focus sealed tube' 
_diffrn_radiation_monochromator   graphite 
_diffrn_measurement_device_type   'Bruker APEX-II CCD' 
_diffrn_measurement_method        '\f and \w scans' 
_diffrn_detector_area_resol_mean  ? 
_diffrn_reflns_number             24202 
_diffrn_reflns_av_R_equivalents   0.0246 
_diffrn_reflns_av_sigmaI/netI     0.0316 
_diffrn_reflns_limit_h_min        -13 
_diffrn_reflns_limit_h_max        13 
_diffrn_reflns_limit_k_min        -17 
_diffrn_reflns_limit_k_max        17 
_diffrn_reflns_limit_l_min        -21 
_diffrn_reflns_limit_l_max        21 
_diffrn_reflns_theta_min          1.28 
_diffrn_reflns_theta_max          27.10 
_reflns_number_total              9383 
_reflns_number_gt                 8357 
_reflns_threshold_expression      >2sigma(I) 
  
_computing_data_collection        'Bruker APEX2' 
_computing_cell_refinement        'Bruker SAINT' 
_computing_data_reduction         'Bruker SAINT' 
_computing_structure_solution     'SHELXS-97 (Sheldrick, 2008)' 
_computing_structure_refinement   'SHELXL-97 (Sheldrick, 2008)' 
_computing_molecular_graphics     'Bruker SHELXTL' 
_computing_publication_material   'Bruker SHELXTL' 
  
_refine_special_details 
; 
 Refinement of F^2^ against ALL reflections.  The weighted R-factor wR and 
 goodness of fit S are based on F^2^, conventional R-factors R are based 
 on F, with F set to zero for negative F^2^. The threshold expression of 
 F^2^ > 2sigma(F^2^) is used only for calculating R-factors(gt) etc. and is 
 not relevant to the choice of reflections for refinement.  R-factors based 
 on F^2^ are statistically about twice as large as those based on F, and R- 
 factors based on ALL data will be even larger. 
; 
  
_refine_ls_structure_factor_coef  Fsqd 
_refine_ls_matrix_type            full 
_refine_ls_weighting_scheme       calc 
_refine_ls_weighting_details 
 'calc w=1/[\s^2^(Fo^2^)+(0.0276P)^2^+0.8855P] where P=(Fo^2^+2Fc^2^)/3' 
_atom_sites_solution_primary      direct 
_atom_sites_solution_secondary    difmap 
_atom_sites_solution_hydrogens    geom 
_refine_ls_hydrogen_treatment     constr 
_refine_ls_extinction_method      none 
_refine_ls_extinction_coef        ? 
_refine_ls_number_reflns          9383 
_refine_ls_number_parameters      408 
_refine_ls_number_restraints      0 
_refine_ls_R_factor_all           0.0307 
_refine_ls_R_factor_gt            0.0239 
_refine_ls_wR_factor_ref          0.0564 
_refine_ls_wR_factor_gt           0.0538 
_refine_ls_goodness_of_fit_ref    1.026 
_refine_ls_restrained_S_all       1.026 
_refine_ls_shift/su_max           0.004 
_refine_ls_shift/su_mean          0.000 
  
loop_ 
 _atom_site_label 
 _atom_site_type_symbol 
 _atom_site_fract_x 
 _atom_site_fract_y 
 _atom_site_fract_z 
 _atom_site_U_iso_or_equiv 
 _atom_site_adp_type 
 _atom_site_occupancy 
 _atom_site_symmetry_multiplicity 
 _atom_site_calc_flag 
 _atom_site_refinement_flags 
 _atom_site_disorder_assembly 
 _atom_site_disorder_group 
Ho1 Ho 0.537061(11) 0.917440(8) 0.410639(7) 0.01851(4) Uani 1 1 d . . . 
K1 K 1.0000 0.5000 0.0000 0.02564(16) Uani 1 2 d S . . 
Si1 Si 0.75518(7) 1.03091(6) 0.25927(4) 0.02492(15) Uani 1 1 d . D . 
Si2 Si 0.47701(8) 1.09288(6) 0.20720(5) 0.02961(16) Uani 1 1 d . D . 
Si3 Si 0.68781(7) 0.67378(5) 0.36603(4) 0.02187(14) Uani 1 1 d . D . 
Si4 Si 0.71029(7) 0.67255(5) 0.53962(4) 0.02286(14) Uani 1 1 d . D . 
O1 O 0.32533(17) 0.87051(14) 0.43252(12) 0.0311(4) Uani 1 1 d . . . 
O2 O 1.22786(19) 0.50302(15) 0.05542(11) 0.0310(4) Uani 1 1 d . . . 
O3 O 0.99426(18) 0.47457(14) 0.17271(11) 0.0287(4) Uani 1 1 d . . . 
O4 O 0.79162(17) 0.43031(14) 0.11668(11) 0.0277(4) Uani 1 1 d . . . 
O5 O 1.1288(2) 0.28487(17) 0.04567(14) 0.0491(6) Uani 1 1 d . . . 
O6 O 1.4024(3) 0.6738(2) 0.14838(17) 0.0663(7) Uani 1 1 d . . . 
N1 N 0.5920(2) 1.02329(16) 0.27757(13) 0.0251(4) Uani 1 1 d . . . 
N2 N 0.6527(2) 0.73457(15) 0.44375(12) 0.0207(4) Uani 1 1 d . . . 
N3 N 0.57068(19) 0.98818(16) 0.49958(13) 0.0229(4) Uani 1 1 d . . . 
C1 C 0.8554(3) 0.9271(2) 0.34441(18) 0.0332(6) Uani 1 1 d . . . 
H1A H 0.9488 0.9330 0.3337 0.050 Uiso 1 1 calc R D . 
H1B H 0.8569 0.8552 0.3448 0.050 Uiso 1 1 calc R . . 
H1C H 0.8125 0.9390 0.3991 0.050 Uiso 1 1 calc R . . 
C2 C 0.7727(3) 1.1625(2) 0.25914(19) 0.0347(6) Uani 1 1 d . . . 
H2A H 0.8686 1.1555 0.2601 0.052 Uiso 1 1 calc R D . 
H2B H 0.7178 1.1825 0.3090 0.052 Uiso 1 1 calc R . . 
H2C H 0.7409 1.2181 0.2082 0.052 Uiso 1 1 calc R . . 
C3 C 0.8501(3) 1.0053(3) 0.15696(18) 0.0428(7) Uani 1 1 d . . . 
H3C H 0.9449 1.0057 0.1524 0.064 Uiso 1 1 calc R D . 
H3D H 0.8069 1.0617 0.1098 0.064 Uiso 1 1 calc R . . 
H3E H 0.8479 0.9352 0.1555 0.064 Uiso 1 1 calc R . . 
C4 C 0.4849(3) 1.2345(2) 0.15147(17) 0.0343(6) Uani 1 1 d . . . 
H4A H 0.4745 1.2725 0.1931 0.051 Uiso 1 1 calc R D . 
H4B H 0.4112 1.2715 0.1159 0.051 Uiso 1 1 calc R . . 
H4C H 0.5730 1.2335 0.1163 0.051 Uiso 1 1 calc R . . 
C5 C 0.2996(3) 1.1006(3) 0.2620(2) 0.0478(8) Uani 1 1 d . . . 
H5A H 0.2854 1.1299 0.3095 0.072 Uiso 1 1 calc R D . 
H5B H 0.2863 1.0284 0.2828 0.072 Uiso 1 1 calc R . . 
H5C H 0.2340 1.1474 0.2224 0.072 Uiso 1 1 calc R . . 
C6 C 0.4968(4) 1.0308(2) 0.12021(19) 0.0491(9) Uani 1 1 d . . . 
H6A H 0.4863 0.9579 0.1445 0.074 Uiso 1 1 calc R D . 
H6B H 0.5875 1.0276 0.0881 0.074 Uiso 1 1 calc R . . 
H6C H 0.4271 1.0745 0.0827 0.074 Uiso 1 1 calc R . . 
C7 C 0.5972(3) 0.7688(2) 0.27372(16) 0.0308(6) Uani 1 1 d . . . 
H7A H 0.6353 0.8304 0.2490 0.046 Uiso 1 1 calc R D . 
H7B H 0.4998 0.7941 0.2927 0.046 Uiso 1 1 calc R . . 
H7C H 0.6092 0.7316 0.2313 0.046 Uiso 1 1 calc R . . 
C8 C 0.8736(3) 0.6351(3) 0.3238(2) 0.0392(7) Uani 1 1 d . . . 
H8A H 0.9080 0.6985 0.3048 0.059 Uiso 1 1 calc R D . 
H8B H 0.8846 0.6065 0.2763 0.059 Uiso 1 1 calc R . . 
H8C H 0.9249 0.5801 0.3683 0.059 Uiso 1 1 calc R . . 
C9 C 0.6290(3) 0.5489(2) 0.39442(17) 0.0308(6) Uani 1 1 d . . . 
H9A H 0.5352 0.5625 0.4226 0.046 Uiso 1 1 calc R D . 
H9B H 0.6887 0.4895 0.4323 0.046 Uiso 1 1 calc R . . 
H9C H 0.6326 0.5299 0.3431 0.046 Uiso 1 1 calc R . . 
C10 C 0.7767(3) 0.5219(2) 0.56595(18) 0.0358(6) Uani 1 1 d . . . 
H10A H 0.7024 0.4914 0.5694 0.054 Uiso 1 1 calc R D . 
H10B H 0.8128 0.4936 0.6202 0.054 Uiso 1 1 calc R . . 
H10C H 0.8494 0.5021 0.5219 0.054 Uiso 1 1 calc R . . 
C11 C 0.8532(3) 0.7200(3) 0.54940(19) 0.0428(8) Uani 1 1 d . . . 
H11A H 0.8212 0.7973 0.5432 0.064 Uiso 1 1 calc R D . 
H11B H 0.9288 0.7057 0.5053 0.064 Uiso 1 1 calc R . . 
H11C H 0.8845 0.6817 0.6048 0.064 Uiso 1 1 calc R . . 
C12 C 0.5714(3) 0.7000(2) 0.62621(17) 0.0404(7) Uani 1 1 d . . . 
H12A H 0.5340 0.7778 0.6169 0.061 Uiso 1 1 calc R D . 
H12B H 0.6083 0.6676 0.6803 0.061 Uiso 1 1 calc R . . 
H12C H 0.4990 0.6689 0.6269 0.061 Uiso 1 1 calc R . . 
C17 C 1.3055(3) 0.5698(2) -0.00372(18) 0.0324(6) Uani 1 1 d . . . 
H17A H 1.3919 0.5579 0.0174 0.039 Uiso 1 1 calc R . . 
H17B H 1.2537 0.6464 -0.0120 0.039 Uiso 1 1 calc R . . 
C18 C 1.2075(3) 0.5149(2) 0.13764(18) 0.0356(6) Uani 1 1 d . . . 
H18A H 1.1573 0.5901 0.1366 0.043 Uiso 1 1 calc R . . 
H18B H 1.2967 0.4978 0.1573 0.043 Uiso 1 1 calc R . . 
C19 C 1.1280(3) 0.4408(2) 0.19632(18) 0.0361(6) Uani 1 1 d . . . 
H19A H 1.1737 0.3663 0.1934 0.043 Uiso 1 1 calc R . . 
H19B H 1.1227 0.4421 0.2549 0.043 Uiso 1 1 calc R . . 
C20 C 0.9125(3) 0.4074(2) 0.22678(16) 0.0319(6) Uani 1 1 d . . . 
H20A H 0.9032 0.4100 0.2854 0.038 Uiso 1 1 calc R . . 
H20B H 0.9564 0.3321 0.2256 0.038 Uiso 1 1 calc R . . 
C21 C 0.7757(3) 0.4457(2) 0.19768(16) 0.0311(6) Uani 1 1 d . . . 
H21A H 0.7145 0.4047 0.2379 0.037 Uiso 1 1 calc R . . 
H21B H 0.7349 0.5228 0.1943 0.037 Uiso 1 1 calc R . . 
C22 C 0.6652(3) 0.4576(2) 0.08543(18) 0.0309(6) Uani 1 1 d . . . 
H22A H 0.6194 0.5353 0.0764 0.037 Uiso 1 1 calc R . . 
H22B H 0.6045 0.4168 0.1264 0.037 Uiso 1 1 calc R . . 
C15 C 0.1180(3) 0.8648(2) 0.5233(2) 0.0434(7) Uani 1 1 d . . . 
H15A H 0.0445 0.8759 0.4905 0.052 Uiso 1 1 calc R A 1 
H15B H 0.0763 0.8788 0.5782 0.052 Uiso 1 1 calc R A 1 
C23 C 1.0603(3) 0.2033(2) 0.06927(18) 0.0399(7) Uani 1 1 d . . . 
H23A H 0.9655 0.2296 0.0946 0.048 Uiso 1 1 calc R . . 
H23B H 1.1080 0.1388 0.1109 0.048 Uiso 1 1 calc R . . 
C24 C 1.0611(4) 0.1768(3) -0.0092(2) 0.0561(9) Uani 1 1 d . . . 
H24A H 0.9861 0.2275 -0.0417 0.067 Uiso 1 1 calc R . . 
H24B H 1.0572 0.1022 0.0024 0.067 Uiso 1 1 calc R . . 
C26 C 0.7749(3) 0.7307(3) 0.0262(2) 0.0550(9) Uani 1 1 d . . . 
H26A H 0.6811 0.7543 0.0111 0.066 Uiso 1 1 calc R B 1 
H26B H 0.7856 0.6620 0.0717 0.066 Uiso 1 1 calc R B 1 
C27 C 1.3804(4) 0.7781(3) 0.0931(2) 0.0540(9) Uani 1 1 d . E . 
H27A H 1.3580 0.7817 0.0383 0.065 Uiso 1 1 calc R C 1 
H27B H 1.4596 0.8067 0.0837 0.065 Uiso 1 1 calc R C 1 
C13B C 0.3039(8) 0.7714(6) 0.4412(5) 0.033(2) Uiso 0.50 1 d P D 2 
H13C H 0.2768 0.7729 0.3884 0.040 Uiso 0.50 1 calc PR D 2 
H13D H 0.3892 0.7130 0.4525 0.040 Uiso 0.50 1 calc PR D 2 
C14B C 0.2035(16) 0.7530(12) 0.5064(10) 0.065(4) Uiso 0.30 1 d P D 2 
H14C H 0.2442 0.7027 0.5575 0.077 Uiso 0.30 1 calc PR D 2 
H14D H 0.1435 0.7206 0.4917 0.077 Uiso 0.30 1 calc PR D 2 
C16B C 0.1929(5) 0.9410(4) 0.4505(4) 0.0196(12) Uiso 0.50 1 d P D 2 
H16C H 0.1436 0.9730 0.4003 0.024 Uiso 0.50 1 calc PR D 2 
H16D H 0.2010 0.9994 0.4692 0.024 Uiso 0.50 1 calc PR D 2 
C25 C 0.8522(7) 0.7656(6) 0.0767(4) 0.0441(15) Uiso 0.50 1 d P . 2 
H25A H 0.7879 0.8133 0.1094 0.053 Uiso 0.50 1 calc PR . 2 
H25B H 0.9077 0.7024 0.1155 0.053 Uiso 0.50 1 calc PR . 2 
C28 C 1.2504(7) 0.8430(6) 0.1143(4) 0.0646(18) Uiso 0.70 1 d P E 2 
H28A H 1.1798 0.8330 0.0898 0.077 Uiso 0.70 1 calc PR E 2 
H28B H 1.2482 0.9200 0.0947 0.077 Uiso 0.70 1 calc PR E 2 
C29 C 1.2304(7) 0.8042(6) 0.2076(4) 0.0692(16) Uiso 0.70 1 d P E 2 
H29A H 1.2699 0.8417 0.2326 0.083 Uiso 0.70 1 calc PR E 2 
H29B H 1.1324 0.8154 0.2292 0.083 Uiso 0.70 1 calc PR E 2 
C30 C 1.2986(8) 0.6955(6) 0.2257(4) 0.0403(17) Uiso 0.50 1 d P E 2 
H30A H 1.2325 0.6530 0.2387 0.048 Uiso 0.50 1 calc PR E 2 
H30B H 1.3470 0.6736 0.2754 0.048 Uiso 0.50 1 calc PR E 2 
C13 C 0.3129(7) 0.7588(5) 0.4594(5) 0.0201(17) Uiso 0.50 1 d P D 1 
H13A H 0.2808 0.7445 0.4147 0.024 Uiso 0.50 1 calc PR D 1 
H13B H 0.4016 0.7057 0.4724 0.024 Uiso 0.50 1 calc PR D 1 
C14 C 0.2115(4) 0.7535(3) 0.5357(3) 0.0256(9) Uiso 0.70 1 d P D 1 
H14A H 0.2569 0.7312 0.5868 0.031 Uiso 0.70 1 calc PR D 1 
H14B H 0.1606 0.7017 0.5414 0.031 Uiso 0.70 1 calc PR D 1 
C16 C 0.2021(7) 0.9314(5) 0.4790(5) 0.0371(17) Uiso 0.50 1 d P D 1 
H16A H 0.2314 0.9563 0.5187 0.045 Uiso 0.50 1 calc PR D 1 
H16B H 0.1511 0.9952 0.4384 0.045 Uiso 0.50 1 calc PR D 1 
C25B C 0.7960(8) 0.8079(6) 0.0542(5) 0.0504(17) Uiso 0.50 1 d P . 1 
H25C H 0.7951 0.7834 0.1161 0.061 Uiso 0.50 1 calc PR . 1 
H25D H 0.7237 0.8764 0.0391 0.061 Uiso 0.50 1 calc PR . 1 
C28B C 1.243(2) 0.8430(18) 0.1503(16) 0.100(7) Uiso 0.30 1 d P E 1 
H28C H 1.2663 0.8933 0.1714 0.119 Uiso 0.30 1 calc PR E 1 
H28D H 1.1649 0.8822 0.1175 0.119 Uiso 0.30 1 calc PR E 1 
C29B C 1.2163(13) 0.7481(11) 0.2200(8) 0.051(3) Uiso 0.30 1 d P E 1 
H29C H 1.1847 0.7674 0.2736 0.062 Uiso 0.30 1 calc PR E 1 
H29D H 1.1445 0.7251 0.2076 0.062 Uiso 0.30 1 calc PR E 1 
C30B C 1.3418(8) 0.6619(6) 0.2270(4) 0.0414(18) Uiso 0.50 1 d P E 1 
H30C H 1.3991 0.6687 0.2631 0.050 Uiso 0.50 1 calc PR E 1 
H30D H 1.3228 0.5910 0.2510 0.050 Uiso 0.50 1 calc PR E 1 
  
loop_ 
 _atom_site_aniso_label 
 _atom_site_aniso_U_11 
 _atom_site_aniso_U_22 
 _atom_site_aniso_U_33 
 _atom_site_aniso_U_23 
 _atom_site_aniso_U_13 
 _atom_site_aniso_U_12 
Ho1 0.01915(6) 0.01647(6) 0.01845(6) -0.00462(4) -0.00055(4) -0.00455(4) 
K1 0.0275(4) 0.0287(4) 0.0241(4) -0.0086(3) -0.0020(3) -0.0118(3) 
Si1 0.0308(4) 0.0236(3) 0.0219(3) -0.0076(3) 0.0031(3) -0.0125(3) 
Si2 0.0424(4) 0.0245(4) 0.0241(4) -0.0018(3) -0.0099(3) -0.0135(3) 
Si3 0.0223(3) 0.0202(3) 0.0228(3) -0.0086(3) 0.0001(3) -0.0048(3) 
Si4 0.0226(3) 0.0227(3) 0.0216(3) -0.0035(3) -0.0041(3) -0.0061(3) 
O1 0.0205(9) 0.0230(9) 0.0487(12) -0.0135(8) 0.0027(8) -0.0060(7) 
O2 0.0336(10) 0.0323(10) 0.0316(10) -0.0092(8) -0.0063(8) -0.0133(8) 
O3 0.0357(10) 0.0281(9) 0.0226(9) -0.0055(7) -0.0050(8) -0.0102(8) 
O4 0.0263(9) 0.0310(10) 0.0268(9) -0.0119(8) 0.0025(7) -0.0093(8) 
O5 0.0617(15) 0.0375(12) 0.0505(14) -0.0119(10) -0.0008(11) -0.0217(11) 
O6 0.086(2) 0.0491(15) 0.0580(16) -0.0183(12) 0.0126(14) -0.0221(14) 
N1 0.0316(12) 0.0235(11) 0.0219(11) -0.0048(8) -0.0029(9) -0.0119(9) 
N2 0.0207(10) 0.0186(10) 0.0219(10) -0.0062(8) -0.0030(8) -0.0038(8) 
N3 0.0174(10) 0.0242(11) 0.0255(11) -0.0078(9) -0.0004(8) -0.0046(8) 
C1 0.0301(14) 0.0331(15) 0.0357(15) -0.0082(12) -0.0016(12) -0.0112(12) 
C2 0.0354(15) 0.0279(14) 0.0433(17) -0.0115(12) 0.0001(13) -0.0141(12) 
C3 0.0478(18) 0.0511(19) 0.0331(16) -0.0190(14) 0.0108(14) -0.0216(15) 
C4 0.0465(17) 0.0257(14) 0.0285(14) -0.0044(11) -0.0078(12) -0.0084(12) 
C5 0.0404(18) 0.0481(19) 0.052(2) 0.0035(15) -0.0184(15) -0.0179(15) 
C6 0.087(3) 0.0295(16) 0.0354(17) -0.0025(13) -0.0295(17) -0.0150(16) 
C7 0.0421(16) 0.0297(14) 0.0240(13) -0.0085(11) -0.0049(11) -0.0129(12) 
C8 0.0278(15) 0.0468(18) 0.0462(18) -0.0275(15) 0.0065(13) -0.0073(13) 
C9 0.0377(15) 0.0235(13) 0.0319(14) -0.0101(11) -0.0021(12) -0.0085(11) 
C10 0.0413(17) 0.0258(14) 0.0334(15) -0.0010(12) -0.0105(13) -0.0040(12) 
C11 0.0467(18) 0.0485(18) 0.0352(16) 0.0060(14) -0.0207(14) -0.0240(15) 
C12 0.0423(17) 0.0447(18) 0.0242(14) -0.0080(13) 0.0010(12) -0.0044(14) 
C17 0.0253(14) 0.0319(14) 0.0438(16) -0.0131(12) -0.0055(12) -0.0096(11) 
C18 0.0359(16) 0.0412(16) 0.0357(16) -0.0148(13) -0.0133(12) -0.0086(13) 
C19 0.0385(16) 0.0382(16) 0.0294(15) -0.0067(12) -0.0127(12) -0.0055(13) 
C20 0.0476(17) 0.0262(13) 0.0206(13) -0.0041(10) -0.0021(12) -0.0126(12) 
C21 0.0376(15) 0.0292(14) 0.0266(14) -0.0107(11) 0.0075(11) -0.0140(12) 
C22 0.0230(13) 0.0301(14) 0.0411(16) -0.0128(12) -0.0004(11) -0.0090(11) 
C15 0.0340(16) 0.0424(17) 0.0429(18) -0.0107(14) 0.0054(13) -0.0045(13) 
C23 0.0505(19) 0.0348(16) 0.0350(16) -0.0090(13) 0.0032(14) -0.0191(14) 
C24 0.066(2) 0.066(2) 0.046(2) -0.0210(18) 0.0031(17) -0.031(2) 
C26 0.0390(18) 0.0432(19) 0.066(2) -0.0034(17) 0.0067(16) -0.0099(15) 
C27 0.073(3) 0.052(2) 0.0428(19) -0.0150(16) -0.0004(17) -0.0287(19) 
  
_geom_special_details 
; 
 All esds (except the esd in the dihedral angle between two l.s. planes) 
 are estimated using the full covariance matrix.  The cell esds are taken 
 into account individually in the estimation of esds in distances, angles 
 and torsion angles; correlations between esds in cell parameters are only 
 used when they are defined by crystal symmetry.  An approximate (isotropic) 
 treatment of cell esds is used for estimating esds involving l.s. planes. 
; 
  
loop_ 
 _geom_bond_atom_site_label_1 
 _geom_bond_atom_site_label_2 
 _geom_bond_distance 
 _geom_bond_site_symmetry_2 
 _geom_bond_publ_flag 
Ho1 N3 2.188(2) . ? 
Ho1 N3 2.210(2) 2_676 ? 
Ho1 N1 2.308(2) . ? 
Ho1 N2 2.3348(19) . ? 
Ho1 O1 2.4243(17) . ? 
K1 O5 2.732(2) . ? 
K1 O5 2.733(2) 2_765 ? 
K1 O2 2.7666(18) . ? 
K1 O2 2.7666(18) 2_765 ? 
K1 O4 2.7915(17) 2_765 ? 
K1 O4 2.7915(17) . ? 
K1 O3 2.8240(17) . ? 
K1 O3 2.8240(17) 2_765 ? 
Si1 N1 1.699(2) . ? 
Si1 C2 1.875(3) . ? 
Si1 C1 1.879(3) . ? 
Si1 C3 1.883(3) . ? 
Si2 N1 1.704(2) . ? 
Si2 C5 1.871(3) . ? 
Si2 C4 1.878(3) . ? 
Si2 C6 1.883(3) . ? 
Si3 N2 1.702(2) . ? 
Si3 C7 1.880(3) . ? 
Si3 C8 1.881(3) . ? 
Si3 C9 1.887(3) . ? 
Si4 N2 1.705(2) . ? 
Si4 C12 1.867(3) . ? 
Si4 C11 1.874(3) . ? 
Si4 C10 1.882(3) . ? 
O1 C13B 1.406(8) . ? 
O1 C16B 1.442(5) . ? 
O1 C13 1.489(7) . ? 
O1 C16 1.506(7) . ? 
O2 C18 1.421(3) . ? 
O2 C17 1.422(3) . ? 
O3 C20 1.425(3) . ? 
O3 C19 1.425(3) . ? 
O4 C22 1.422(3) . ? 
O4 C21 1.426(3) . ? 
O5 C23 1.425(3) . ? 
O5 C26 1.428(4) 2_765 ? 
O6 C30B 1.327(7) . ? 
O6 C27 1.403(4) . ? 
O6 C30 1.553(8) . ? 
N3 N3 1.404(4) 2_676 ? 
N3 Ho1 2.209(2) 2_676 ? 
C17 C22 1.499(4) 2_765 ? 
C18 C19 1.495(4) . ? 
C20 C21 1.488(4) . ? 
C22 C17 1.499(4) 2_765 ? 
C15 C16 1.398(7) . ? 
C15 C14 1.494(5) . ? 
C15 C16B 1.577(6) . ? 
C15 C14B 1.588(15) . ? 
C23 C24 1.493(4) . ? 
C24 C25 1.473(7) 2_765 ? 
C24 C25B 1.568(8) 2_765 ? 
C26 C25B 1.392(8) . ? 
C26 O5 1.428(4) 2_765 ? 
C26 C25 1.566(8) . ? 
C27 C28 1.406(7) . ? 
C27 C28B 1.71(2) . ? 
C13B C14B 1.366(17) . ? 
C25 C24 1.473(7) 2_765 ? 
C28 C29 1.482(9) . ? 
C29 C30 1.387(10) . ? 
C13 C14 1.480(8) . ? 
C25B C24 1.568(8) 2_765 ? 
C28B C29B 1.50(3) . ? 
C29B C30B 1.448(14) . ? 
  
loop_ 
 _geom_angle_atom_site_label_1 
 _geom_angle_atom_site_label_2 
 _geom_angle_atom_site_label_3 
 _geom_angle 
 _geom_angle_site_symmetry_1 
 _geom_angle_site_symmetry_3 
 _geom_angle_publ_flag 
N3 Ho1 N3 37.24(9) . 2_676 ? 
N3 Ho1 N1 106.43(7) . . ? 
N3 Ho1 N1 112.89(7) 2_676 . ? 
N3 Ho1 N2 109.57(7) . . ? 
N3 Ho1 N2 126.81(7) 2_676 . ? 
N1 Ho1 N2 117.44(7) . . ? 
N3 Ho1 O1 118.60(7) . . ? 
N3 Ho1 O1 84.43(7) 2_676 . ? 
N1 Ho1 O1 115.52(7) . . ? 
N2 Ho1 O1 88.90(6) . . ? 
O5 K1 O5 180.0 . 2_765 ? 
O5 K1 O2 80.13(6) . . ? 
O5 K1 O2 99.87(6) 2_765 . ? 
O5 K1 O2 99.87(6) . 2_765 ? 
O5 K1 O2 80.13(6) 2_765 2_765 ? 
O2 K1 O2 180.0 . 2_765 ? 
O5 K1 O4 98.48(6) . 2_765 ? 
O5 K1 O4 81.52(6) 2_765 2_765 ? 
O2 K1 O4 60.19(5) . 2_765 ? 
O2 K1 O4 119.81(5) 2_765 2_765 ? 
O5 K1 O4 81.52(6) . . ? 
O5 K1 O4 98.48(6) 2_765 . ? 
O2 K1 O4 119.81(5) . . ? 
O2 K1 O4 60.19(5) 2_765 . ? 
O4 K1 O4 180.0 2_765 . ? 
O5 K1 O3 82.55(6) . . ? 
O5 K1 O3 97.44(6) 2_765 . ? 
O2 K1 O3 61.00(5) . . ? 
O2 K1 O3 119.00(5) 2_765 . ? 
O4 K1 O3 119.96(5) 2_765 . ? 
O4 K1 O3 60.04(5) . . ? 
O5 K1 O3 97.45(6) . 2_765 ? 
O5 K1 O3 82.56(6) 2_765 2_765 ? 
O2 K1 O3 119.00(5) . 2_765 ? 
O2 K1 O3 61.00(5) 2_765 2_765 ? 
O4 K1 O3 60.04(5) 2_765 2_765 ? 
O4 K1 O3 119.95(5) . 2_765 ? 
O3 K1 O3 179.999(1) . 2_765 ? 
N1 Si1 C2 114.51(12) . . ? 
N1 Si1 C1 110.17(11) . . ? 
C2 Si1 C1 105.11(13) . . ? 
N1 Si1 C3 113.79(13) . . ? 
C2 Si1 C3 106.50(14) . . ? 
C1 Si1 C3 106.08(14) . . ? 
N1 Si2 C5 110.13(12) . . ? 
N1 Si2 C4 113.93(12) . . ? 
C5 Si2 C4 107.11(14) . . ? 
N1 Si2 C6 114.04(13) . . ? 
C5 Si2 C6 106.38(16) . . ? 
C4 Si2 C6 104.71(13) . . ? 
N2 Si3 C7 109.28(11) . . ? 
N2 Si3 C8 114.35(12) . . ? 
C7 Si3 C8 105.95(14) . . ? 
N2 Si3 C9 115.30(11) . . ? 
C7 Si3 C9 105.03(12) . . ? 
C8 Si3 C9 106.15(13) . . ? 
N2 Si4 C12 110.91(12) . . ? 
N2 Si4 C11 111.95(12) . . ? 
C12 Si4 C11 107.25(15) . . ? 
N2 Si4 C10 115.08(11) . . ? 
C12 Si4 C10 105.52(14) . . ? 
C11 Si4 C10 105.58(14) . . ? 
C13B O1 C16B 106.2(4) . . ? 
C16B O1 C13 108.1(4) . . ? 
C13B O1 C16 107.0(4) . . ? 
C13 O1 C16 104.8(4) . . ? 
C13B O1 Ho1 129.6(4) . . ? 
C16B O1 Ho1 123.7(2) . . ? 
C13 O1 Ho1 125.0(3) . . ? 
C16 O1 Ho1 118.1(3) . . ? 
C18 O2 C17 112.5(2) . . ? 
C18 O2 K1 115.59(15) . . ? 
C17 O2 K1 115.19(15) . . ? 
C20 O3 C19 111.7(2) . . ? 
C20 O3 K1 113.50(14) . . ? 
C19 O3 K1 111.87(15) . . ? 
C22 O4 C21 112.88(19) . . ? 
C22 O4 K1 115.63(15) . . ? 
C21 O4 K1 116.11(14) . . ? 
C23 O5 C26 106.6(2) . 2_765 ? 
C23 O5 K1 123.77(19) . . ? 
C26 O5 K1 103.83(18) 2_765 . ? 
C30B O6 C27 117.9(4) . . ? 
C27 O6 C30 100.4(4) . . ? 
Si1 N1 Si2 123.50(12) . . ? 
Si1 N1 Ho1 113.29(10) . . ? 
Si2 N1 Ho1 123.10(11) . . ? 
Si3 N2 Si4 123.58(12) . . ? 
Si3 N2 Ho1 117.13(10) . . ? 
Si4 N2 Ho1 119.01(10) . . ? 
N3 N3 Ho1 72.20(16) 2_676 . ? 
N3 N3 Ho1 70.56(15) 2_676 2_676 ? 
Ho1 N3 Ho1 142.75(9) . 2_676 ? 
O2 C17 C22 108.4(2) . 2_765 ? 
O2 C18 C19 109.3(2) . . ? 
O3 C19 C18 108.9(2) . . ? 
O3 C20 C21 109.0(2) . . ? 
O4 C21 C20 108.3(2) . . ? 
O4 C22 C17 107.8(2) . 2_765 ? 
C16 C15 C14 104.2(4) . . ? 
C14 C15 C16B 106.6(3) . . ? 
C16 C15 C14B 102.5(6) . . ? 
C16B C15 C14B 99.1(6) . . ? 
O5 C23 C24 106.8(2) . . ? 
C25 C24 C23 107.4(4) 2_765 . ? 
C23 C24 C25B 98.2(4) . 2_765 ? 
C25B C26 O5 109.7(4) . 2_765 ? 
O5 C26 C25 103.4(3) 2_765 . ? 
C25B C26 K1 128.2(4) . . ? 
O6 C27 C28 110.9(4) . . ? 
O6 C27 C28B 99.4(8) . . ? 
C14B C13B O1 109.0(8) . . ? 
C13B C14B C15 108.1(10) . . ? 
O1 C16B C15 103.8(3) . . ? 
C24 C25 C26 102.4(4) 2_765 . ? 
C27 C28 C29 103.1(5) . . ? 
C30 C29 C28 104.1(5) . . ? 
C29 C30 O6 109.2(6) . . ? 
C14 C13 O1 104.6(4) . . ? 
C13 C14 C15 105.4(4) . . ? 
C15 C16 O1 109.8(4) . . ? 
C26 C25B C24 106.1(5) . 2_765 ? 
C29B C28B C27 99.4(13) . . ? 
C30B C29B C28B 108.2(12) . . ? 
O6 C30B C29B 104.2(7) . . ? 
  
_diffrn_measured_fraction_theta_max    0.986 
_diffrn_reflns_theta_full              25.50 
_diffrn_measured_fraction_theta_full   0.997 
_refine_diff_density_max    0.921 
_refine_diff_density_min   -0.639 
_refine_diff_density_rms    0.076 

#===END

 
data_mf83 
  
_audit_creation_method            SHELXTL 
_chemical_name_systematic 
; 
 ? 
; 
_chemical_name_common             ? 
_chemical_melting_point           ? 
_chemical_formula_moiety          ? 
_chemical_formula_sum 
 'C60 H144 Er2 K N6 O12 Si8' 
_chemical_formula_weight          1740.15 
  
loop_ 
 _atom_type_symbol 
 _atom_type_description 
 _atom_type_scat_dispersion_real 
 _atom_type_scat_dispersion_imag 
 _atom_type_scat_source 
 'C'  'C'   0.0033   0.0016 
 'International Tables Vol C Tables 4.2.6.8 and 6.1.1.4' 
 'H'  'H'   0.0000   0.0000 
 'International Tables Vol C Tables 4.2.6.8 and 6.1.1.4' 
 'N'  'N'   0.0061   0.0033 
 'International Tables Vol C Tables 4.2.6.8 and 6.1.1.4' 
 'O'  'O'   0.0106   0.0060 
 'International Tables Vol C Tables 4.2.6.8 and 6.1.1.4' 
 'Si'  'Si'   0.0817   0.0704 
 'International Tables Vol C Tables 4.2.6.8 and 6.1.1.4' 
 'K'  'K'   0.2009   0.2494 
 'International Tables Vol C Tables 4.2.6.8 and 6.1.1.4' 
 'Er'  'Er'  -0.2586   4.9576 
 'International Tables Vol C Tables 4.2.6.8 and 6.1.1.4' 
  
_symmetry_cell_setting            Triclinic 
_symmetry_space_group_name_H-M    P-1 
  
loop_ 
 _symmetry_equiv_pos_as_xyz 
 'x, y, z' 
 '-x, -y, -z' 
  
_cell_length_a                    10.4612(7) 
_cell_length_b                    13.7234(9) 
_cell_length_c                    16.9659(11) 
_cell_angle_alpha                 70.3977(8) 
_cell_angle_beta                  77.2013(8) 
_cell_angle_gamma                 70.8102(8) 
_cell_volume                      2150.0(2) 
_cell_formula_units_Z             1 
_cell_measurement_temperature     143(2) 
_cell_measurement_reflns_used     8510 
_cell_measurement_theta_min       2.30 
_cell_measurement_theta_max       27.55 
  
_exptl_crystal_description        irregular 
_exptl_crystal_colour             orange 
_exptl_crystal_size_max           0.20 
_exptl_crystal_size_mid           0.19 
_exptl_crystal_size_min           0.11 
_exptl_crystal_density_meas       none 
_exptl_crystal_density_diffrn     1.344 
_exptl_crystal_density_method     'not measured' 
_exptl_crystal_F_000              909 
_exptl_absorpt_coefficient_mu     2.150 
_exptl_absorpt_correction_type    numerical 
_exptl_absorpt_correction_T_min   0.6743 
_exptl_absorpt_correction_T_max   0.7963 
_exptl_absorpt_process_details    'Bruker SADABS' 
  
_exptl_special_details 
; 
 ? 
; 
  
_diffrn_ambient_temperature       143(2) 
_diffrn_radiation_wavelength      0.71073 
_diffrn_radiation_type            MoK\a 
_diffrn_radiation_source          'fine-focus sealed tube' 
_diffrn_radiation_monochromator   graphite 
_diffrn_measurement_device_type   'Bruker APEX-II CCD' 
_diffrn_measurement_method        '\f and \w scans' 
_diffrn_detector_area_resol_mean  ? 
_diffrn_reflns_number             23051 
_diffrn_reflns_av_R_equivalents   0.0292 
_diffrn_reflns_av_sigmaI/netI     0.0433 
_diffrn_reflns_limit_h_min        -13 
_diffrn_reflns_limit_h_max        13 
_diffrn_reflns_limit_k_min        -17 
_diffrn_reflns_limit_k_max        17 
_diffrn_reflns_limit_l_min        -22 
_diffrn_reflns_limit_l_max        21 
_diffrn_reflns_theta_min          1.64 
_diffrn_reflns_theta_max          28.34 
_reflns_number_total              9733 
_reflns_number_gt                 8399 
_reflns_threshold_expression      >2sigma(I) 
  
_computing_data_collection        'Bruker APEX2' 
_computing_cell_refinement        'Bruker SAINT' 
_computing_data_reduction         'Bruker SAINT' 
_computing_structure_solution     'SHELXS-97 (Sheldrick, 2008)' 
_computing_structure_refinement   'SHELXL-97 (Sheldrick, 2008)' 
_computing_molecular_graphics     'Bruker SHELXTL' 
_computing_publication_material   'Bruker SHELXTL' 
  
_refine_special_details 
; 
 Refinement of F^2^ against ALL reflections.  The weighted R-factor wR and 
 goodness of fit S are based on F^2^, conventional R-factors R are based 
 on F, with F set to zero for negative F^2^. The threshold expression of 
 F^2^ > 2sigma(F^2^) is used only for calculating R-factors(gt) etc. and is 
 not relevant to the choice of reflections for refinement.  R-factors based 
 on F^2^ are statistically about twice as large as those based on F, and R- 
 factors based on ALL data will be even larger. 
; 
  
_refine_ls_structure_factor_coef  Fsqd 
_refine_ls_matrix_type            full 
_refine_ls_weighting_scheme       calc 
_refine_ls_weighting_details 
 'calc w=1/[\s^2^(Fo^2^)+(0.0282P)^2^+0.5239P] where P=(Fo^2^+2Fc^2^)/3' 
_atom_sites_solution_primary      direct 
_atom_sites_solution_secondary    difmap 
_atom_sites_solution_hydrogens    geom 
_refine_ls_hydrogen_treatment     constr 
_refine_ls_extinction_method      none 
_refine_ls_extinction_coef        ? 
_refine_ls_number_reflns          9733 
_refine_ls_number_parameters      408 
_refine_ls_number_restraints      0 
_refine_ls_R_factor_all           0.0393 
_refine_ls_R_factor_gt            0.0288 
_refine_ls_wR_factor_ref          0.0618 
_refine_ls_wR_factor_gt           0.0588 
_refine_ls_goodness_of_fit_ref    1.022 
_refine_ls_restrained_S_all       1.022 
_refine_ls_shift/su_max           0.001 
_refine_ls_shift/su_mean          0.000 
  
loop_ 
 _atom_site_label 
 _atom_site_type_symbol 
 _atom_site_fract_x 
 _atom_site_fract_y 
 _atom_site_fract_z 
 _atom_site_U_iso_or_equiv 
 _atom_site_adp_type 
 _atom_site_occupancy 
 _atom_site_symmetry_multiplicity 
 _atom_site_calc_flag 
 _atom_site_refinement_flags 
 _atom_site_disorder_assembly 
 _atom_site_disorder_group 
Er1 Er 0.536454(13) 0.917793(10) 0.411011(8) 0.01817(4) Uani 1 1 d . . . 
K1 K 1.0000 0.5000 0.0000 0.02551(19) Uani 1 2 d S . . 
Si1 Si 0.75431(9) 1.03084(7) 0.25971(5) 0.02484(18) Uani 1 1 d . D . 
Si2 Si 0.47614(9) 1.09273(7) 0.20799(5) 0.02933(19) Uani 1 1 d . D . 
Si3 Si 0.68794(8) 0.67452(6) 0.36602(5) 0.02168(17) Uani 1 1 d . D . 
Si4 Si 0.70951(8) 0.67368(7) 0.53960(5) 0.02273(17) Uani 1 1 d . D . 
O1 O 0.3262(2) 0.87112(16) 0.43261(14) 0.0306(5) Uani 1 1 d . . . 
O2 O 1.2283(2) 0.50297(17) 0.05563(13) 0.0304(5) Uani 1 1 d . . . 
O3 O 0.9937(2) 0.47519(16) 0.17255(12) 0.0273(5) Uani 1 1 d . . . 
O4 O 0.7916(2) 0.43047(17) 0.11674(12) 0.0277(5) Uani 1 1 d . . . 
O5 O 1.1288(3) 0.2844(2) 0.04636(16) 0.0482(6) Uani 1 1 d . . . 
O6 O 1.4021(3) 0.6741(2) 0.14827(18) 0.0636(8) Uani 1 1 d . . . 
N1 N 0.5909(2) 1.02282(19) 0.27870(14) 0.0231(5) Uani 1 1 d . . . 
N2 N 0.6521(2) 0.73593(18) 0.44359(14) 0.0196(5) Uani 1 1 d . . . 
N3 N 0.5710(2) 0.98818(19) 0.49920(14) 0.0227(5) Uani 1 1 d . . . 
C1 C 0.8558(3) 0.9271(3) 0.3442(2) 0.0326(7) Uani 1 1 d . . . 
H1A H 0.9497 0.9325 0.3324 0.049 Uiso 1 1 calc R D . 
H1B H 0.8562 0.8551 0.3453 0.049 Uiso 1 1 calc R . . 
H1C H 0.8145 0.9395 0.3990 0.049 Uiso 1 1 calc R . . 
C2 C 0.7713(3) 1.1629(3) 0.2592(2) 0.0342(7) Uani 1 1 d . . . 
H2A H 0.8672 1.1562 0.2602 0.051 Uiso 1 1 calc R D . 
H2B H 0.7162 1.1831 0.3091 0.051 Uiso 1 1 calc R . . 
H2C H 0.7394 1.2184 0.2082 0.051 Uiso 1 1 calc R . . 
C3 C 0.8484(4) 1.0062(3) 0.1573(2) 0.0417(9) Uani 1 1 d . . . 
H3C H 0.9434 1.0064 0.1526 0.063 Uiso 1 1 calc R D . 
H3D H 0.8050 1.0631 0.1103 0.063 Uiso 1 1 calc R . . 
H3E H 0.8459 0.9362 0.1554 0.063 Uiso 1 1 calc R . . 
C4 C 0.4846(4) 1.2342(2) 0.15173(19) 0.0341(7) Uani 1 1 d . . . 
H4A H 0.4736 1.2727 0.1932 0.051 Uiso 1 1 calc R D . 
H4B H 0.4114 1.2711 0.1157 0.051 Uiso 1 1 calc R . . 
H4C H 0.5731 1.2329 0.1169 0.051 Uiso 1 1 calc R . . 
C5 C 0.2993(4) 1.1012(3) 0.2622(2) 0.0475(10) Uani 1 1 d . . . 
H5A H 0.2857 1.1290 0.3105 0.071 Uiso 1 1 calc R D . 
H5B H 0.2848 1.0294 0.2819 0.071 Uiso 1 1 calc R . . 
H5C H 0.2341 1.1496 0.2227 0.071 Uiso 1 1 calc R . . 
C6 C 0.4963(4) 1.0305(3) 0.1213(2) 0.0491(10) Uani 1 1 d . . . 
H6A H 0.4814 0.9589 0.1456 0.074 Uiso 1 1 calc R D . 
H6B H 0.5885 1.0241 0.0908 0.074 Uiso 1 1 calc R . . 
H6C H 0.4293 1.0760 0.0822 0.074 Uiso 1 1 calc R . . 
C7 C 0.5988(3) 0.7691(2) 0.27348(18) 0.0292(7) Uani 1 1 d . . . 
H7A H 0.6384 0.8299 0.2481 0.044 Uiso 1 1 calc R D . 
H7B H 0.5015 0.7958 0.2923 0.044 Uiso 1 1 calc R . . 
H7C H 0.6098 0.7312 0.2316 0.044 Uiso 1 1 calc R . . 
C8 C 0.8735(3) 0.6352(3) 0.3247(2) 0.0375(8) Uani 1 1 d . . . 
H8A H 0.9084 0.6985 0.3057 0.056 Uiso 1 1 calc R D . 
H8B H 0.8850 0.6064 0.2771 0.056 Uiso 1 1 calc R . . 
H8C H 0.9242 0.5801 0.3695 0.056 Uiso 1 1 calc R . . 
C9 C 0.6293(3) 0.5494(2) 0.39463(19) 0.0295(7) Uani 1 1 d . . . 
H9A H 0.5354 0.5630 0.4228 0.044 Uiso 1 1 calc R D . 
H9B H 0.6890 0.4901 0.4327 0.044 Uiso 1 1 calc R . . 
H9C H 0.6332 0.5302 0.3433 0.044 Uiso 1 1 calc R . . 
C10 C 0.7765(3) 0.5226(2) 0.5658(2) 0.0357(8) Uani 1 1 d . . . 
H10A H 0.7015 0.4917 0.5718 0.054 Uiso 1 1 calc R D . 
H10B H 0.8166 0.4946 0.6188 0.054 Uiso 1 1 calc R . . 
H10C H 0.8464 0.5030 0.5204 0.054 Uiso 1 1 calc R . . 
C11 C 0.8520(4) 0.7210(3) 0.5493(2) 0.0440(9) Uani 1 1 d . . . 
H11A H 0.8204 0.7988 0.5418 0.066 Uiso 1 1 calc R D . 
H11B H 0.9285 0.7053 0.5060 0.066 Uiso 1 1 calc R . . 
H11C H 0.8818 0.6838 0.6053 0.066 Uiso 1 1 calc R . . 
C12 C 0.5705(4) 0.7005(3) 0.6261(2) 0.0398(8) Uani 1 1 d . . . 
H12A H 0.5329 0.7784 0.6169 0.060 Uiso 1 1 calc R D . 
H12B H 0.6071 0.6679 0.6803 0.060 Uiso 1 1 calc R . . 
H12C H 0.4982 0.6694 0.6266 0.060 Uiso 1 1 calc R . . 
C17 C 1.3054(3) 0.5700(3) -0.0039(2) 0.0316(7) Uani 1 1 d . . . 
H17A H 1.3920 0.5584 0.0170 0.038 Uiso 1 1 calc R . . 
H17B H 1.2533 0.6467 -0.0123 0.038 Uiso 1 1 calc R . . 
C18 C 1.2071(3) 0.5153(3) 0.1376(2) 0.0355(8) Uani 1 1 d . . . 
H18A H 1.1565 0.5906 0.1363 0.043 Uiso 1 1 calc R . . 
H18B H 1.2960 0.4984 0.1576 0.043 Uiso 1 1 calc R . . 
C19 C 1.1275(3) 0.4408(3) 0.1961(2) 0.0359(8) Uani 1 1 d . . . 
H19A H 1.1731 0.3664 0.1927 0.043 Uiso 1 1 calc R . . 
H19B H 1.1225 0.4415 0.2548 0.043 Uiso 1 1 calc R . . 
C20 C 0.9120(3) 0.4074(2) 0.22719(18) 0.0312(7) Uani 1 1 d . . . 
H20A H 0.9026 0.4102 0.2858 0.037 Uiso 1 1 calc R . . 
H20B H 0.9559 0.3320 0.2260 0.037 Uiso 1 1 calc R . . 
C21 C 0.7755(3) 0.4458(3) 0.19795(19) 0.0309(7) Uani 1 1 d . . . 
H21A H 0.7141 0.4048 0.2382 0.037 Uiso 1 1 calc R . . 
H21B H 0.7346 0.5230 0.1945 0.037 Uiso 1 1 calc R . . 
C22 C 0.6653(3) 0.4577(3) 0.0856(2) 0.0323(7) Uani 1 1 d . . . 
H22A H 0.6195 0.5355 0.0765 0.039 Uiso 1 1 calc R . . 
H22B H 0.6045 0.4168 0.1267 0.039 Uiso 1 1 calc R . . 
C15 C 0.1189(4) 0.8635(3) 0.5224(2) 0.0445(9) Uani 1 1 d . . . 
H15A H 0.1010 0.8829 0.5758 0.053 Uiso 1 1 calc R A 1 
H15B H 0.0308 0.8683 0.5068 0.053 Uiso 1 1 calc R A 1 
C23 C 1.0604(4) 0.2025(3) 0.0702(2) 0.0389(8) Uani 1 1 d . . . 
H23A H 0.9658 0.2283 0.0962 0.047 Uiso 1 1 calc R . . 
H23B H 1.1089 0.1376 0.1113 0.047 Uiso 1 1 calc R . . 
C24 C 1.0602(4) 0.1772(4) -0.0092(2) 0.0548(11) Uani 1 1 d . . . 
H24A H 1.0964 0.0987 -0.0014 0.066 Uiso 1 1 calc R . . 
H24B H 0.9661 0.2007 -0.0237 0.066 Uiso 1 1 calc R . . 
C26 C 0.7756(4) 0.7306(3) 0.0258(3) 0.0551(11) Uani 1 1 d . . . 
H26A H 0.7518 0.6630 0.0594 0.066 Uiso 1 1 calc R B 1 
H26B H 0.6911 0.7876 0.0091 0.066 Uiso 1 1 calc R B 1 
C27 C 1.3798(4) 0.7784(3) 0.0926(2) 0.0528(10) Uani 1 1 d . E . 
H27A H 1.3882 0.7747 0.0344 0.063 Uiso 1 1 calc R C 1 
H27B H 1.4505 0.8105 0.0948 0.063 Uiso 1 1 calc R C 1 
C13 C 0.3028(9) 0.7725(7) 0.4418(6) 0.029(3) Uiso 0.50 1 d P D 1 
H13A H 0.3892 0.7143 0.4420 0.034 Uiso 0.50 1 calc PR D 1 
H13B H 0.2527 0.7780 0.3967 0.034 Uiso 0.50 1 calc PR D 1 
C14 C 0.2109(4) 0.7532(3) 0.5327(3) 0.0291(9) Uiso 0.80 1 d P D 1 
H14A H 0.1605 0.7000 0.5413 0.035 Uiso 0.80 1 calc PR D 1 
H14B H 0.2659 0.7305 0.5796 0.035 Uiso 0.80 1 calc PR D 1 
C16 C 0.1916(6) 0.9417(5) 0.4508(4) 0.0187(14) Uiso 0.50 1 d P D 1 
H16A H 0.1426 0.9742 0.4004 0.022 Uiso 0.50 1 calc PR D 1 
H16B H 0.1984 0.9998 0.4705 0.022 Uiso 0.50 1 calc PR D 1 
C25 C 0.8533(8) 0.7654(7) 0.0771(5) 0.0444(18) Uiso 0.50 1 d P . 1 
H25A H 0.7891 0.8133 0.1098 0.053 Uiso 0.50 1 calc PR . 1 
H25B H 0.9089 0.7020 0.1159 0.053 Uiso 0.50 1 calc PR . 1 
C28 C 1.2490(8) 0.8450(7) 0.1132(5) 0.068(2) Uiso 0.70 1 d P E 1 
H28A H 1.1781 0.8354 0.0886 0.082 Uiso 0.70 1 calc PR E 1 
H28B H 1.2475 0.9219 0.0936 0.082 Uiso 0.70 1 calc PR E 1 
C29 C 1.2302(8) 0.8050(6) 0.2066(5) 0.0682(19) Uiso 0.70 1 d P E 1 
H29A H 1.2706 0.8422 0.2314 0.082 Uiso 0.70 1 calc PR E 1 
H29B H 1.1321 0.8169 0.2286 0.082 Uiso 0.70 1 calc PR E 1 
C30 C 1.2970(9) 0.6961(7) 0.2254(5) 0.0393(19) Uiso 0.50 1 d P E 1 
H30A H 1.2303 0.6541 0.2379 0.047 Uiso 0.50 1 calc PR E 1 
H30B H 1.3444 0.6739 0.2756 0.047 Uiso 0.50 1 calc PR E 1 
C13B C 0.3150(9) 0.7583(7) 0.4580(6) 0.024(2) Uiso 0.50 1 d P D 2 
H13C H 0.3429 0.7302 0.4082 0.029 Uiso 0.50 1 calc PR D 2 
H13D H 0.3770 0.7115 0.5007 0.029 Uiso 0.50 1 calc PR D 2 
C14B C 0.191(2) 0.7564(17) 0.4886(15) 0.056(5) Uiso 0.20 1 d P D 2 
H14C H 0.1906 0.6901 0.5357 0.067 Uiso 0.20 1 calc PR D 2 
H14D H 0.1419 0.7578 0.4446 0.067 Uiso 0.20 1 calc PR D 2 
C16B C 0.2039(8) 0.9310(6) 0.4799(5) 0.0353(19) Uiso 0.50 1 d P D 2 
H16C H 0.2333 0.9535 0.5210 0.042 Uiso 0.50 1 calc PR D 2 
H16D H 0.1533 0.9963 0.4401 0.042 Uiso 0.50 1 calc PR D 2 
C25B C 0.7953(8) 0.8071(7) 0.0542(5) 0.0465(19) Uiso 0.50 1 d P . 2 
H25C H 0.7940 0.7822 0.1162 0.056 Uiso 0.50 1 calc PR . 2 
H25D H 0.7229 0.8756 0.0391 0.056 Uiso 0.50 1 calc PR . 2 
C28B C 1.241(2) 0.839(2) 0.1469(17) 0.089(7) Uiso 0.30 1 d P E 2 
H28C H 1.2591 0.8943 0.1650 0.107 Uiso 0.30 1 calc PR E 2 
H28D H 1.1639 0.8730 0.1131 0.107 Uiso 0.30 1 calc PR E 2 
C29B C 1.2142(15) 0.7481(13) 0.2211(9) 0.052(3) Uiso 0.30 1 d P E 2 
H29C H 1.1861 0.7709 0.2733 0.062 Uiso 0.30 1 calc PR E 2 
H29D H 1.1411 0.7230 0.2125 0.062 Uiso 0.30 1 calc PR E 2 
C30B C 1.3428(8) 0.6627(7) 0.2265(5) 0.0378(19) Uiso 0.50 1 d P E 2 
H30C H 1.4004 0.6708 0.2617 0.045 Uiso 0.50 1 calc PR E 2 
H30D H 1.3258 0.5910 0.2512 0.045 Uiso 0.50 1 calc PR E 2 
  
loop_ 
 _atom_site_aniso_label 
 _atom_site_aniso_U_11 
 _atom_site_aniso_U_22 
 _atom_site_aniso_U_33 
 _atom_site_aniso_U_23 
 _atom_site_aniso_U_13 
 _atom_site_aniso_U_12 
Er1 0.02011(7) 0.01607(6) 0.01768(6) -0.00529(5) 0.00047(4) -0.00552(5) 
K1 0.0282(5) 0.0287(5) 0.0236(4) -0.0097(4) -0.0007(4) -0.0124(4) 
Si1 0.0323(5) 0.0236(4) 0.0208(4) -0.0080(3) 0.0038(3) -0.0134(4) 
Si2 0.0431(5) 0.0244(4) 0.0233(4) -0.0027(4) -0.0093(4) -0.0139(4) 
Si3 0.0229(4) 0.0201(4) 0.0225(4) -0.0096(3) 0.0011(3) -0.0056(3) 
Si4 0.0227(4) 0.0235(4) 0.0208(4) -0.0043(3) -0.0026(3) -0.0071(3) 
O1 0.0230(11) 0.0246(11) 0.0448(13) -0.0135(10) 0.0031(9) -0.0083(9) 
O2 0.0328(12) 0.0332(12) 0.0317(12) -0.0113(10) -0.0051(9) -0.0145(10) 
O3 0.0340(12) 0.0277(11) 0.0224(10) -0.0071(9) -0.0037(9) -0.0112(9) 
O4 0.0257(11) 0.0314(12) 0.0273(11) -0.0118(9) 0.0021(9) -0.0097(9) 
O5 0.0599(17) 0.0383(14) 0.0507(16) -0.0131(12) 0.0007(13) -0.0238(13) 
O6 0.082(2) 0.0466(17) 0.0561(18) -0.0187(14) 0.0108(15) -0.0187(15) 
N1 0.0316(13) 0.0217(12) 0.0173(12) -0.0042(10) -0.0011(10) -0.0119(11) 
N2 0.0208(12) 0.0183(12) 0.0196(11) -0.0065(10) -0.0008(9) -0.0052(9) 
N3 0.0201(12) 0.0247(13) 0.0238(12) -0.0085(10) -0.0004(10) -0.0066(10) 
C1 0.0291(17) 0.0336(18) 0.0351(18) -0.0101(15) 0.0005(14) -0.0112(14) 
C2 0.0369(18) 0.0307(18) 0.0407(19) -0.0144(15) 0.0010(15) -0.0160(15) 
C3 0.050(2) 0.048(2) 0.0309(18) -0.0190(16) 0.0103(16) -0.0202(18) 
C4 0.048(2) 0.0270(17) 0.0276(16) -0.0065(14) -0.0055(15) -0.0116(15) 
C5 0.041(2) 0.047(2) 0.051(2) 0.0024(18) -0.0186(18) -0.0166(18) 
C6 0.087(3) 0.0304(19) 0.0349(19) -0.0059(16) -0.028(2) -0.0127(19) 
C7 0.0397(18) 0.0270(16) 0.0241(15) -0.0085(13) -0.0043(13) -0.0122(14) 
C8 0.0302(17) 0.046(2) 0.043(2) -0.0306(17) 0.0069(15) -0.0090(15) 
C9 0.0378(18) 0.0225(16) 0.0282(16) -0.0095(13) -0.0015(13) -0.0076(13) 
C10 0.043(2) 0.0264(17) 0.0329(18) -0.0018(14) -0.0122(15) -0.0055(15) 
C11 0.049(2) 0.052(2) 0.0346(19) 0.0061(17) -0.0186(16) -0.0276(18) 
C12 0.045(2) 0.042(2) 0.0237(16) -0.0097(15) 0.0011(14) -0.0043(16) 
C17 0.0257(16) 0.0323(18) 0.0429(19) -0.0152(15) -0.0035(14) -0.0118(14) 
C18 0.0357(18) 0.042(2) 0.0352(18) -0.0142(16) -0.0133(15) -0.0096(15) 
C19 0.043(2) 0.040(2) 0.0267(17) -0.0101(15) -0.0110(14) -0.0087(16) 
C20 0.047(2) 0.0251(16) 0.0199(15) -0.0055(13) 0.0007(13) -0.0125(15) 
C21 0.0395(18) 0.0285(17) 0.0264(16) -0.0122(13) 0.0087(13) -0.0153(14) 
C22 0.0252(16) 0.0307(17) 0.0420(19) -0.0137(15) 0.0036(14) -0.0107(13) 
C15 0.037(2) 0.044(2) 0.044(2) -0.0113(17) 0.0065(16) -0.0093(17) 
C23 0.050(2) 0.0356(19) 0.0332(18) -0.0085(15) 0.0040(16) -0.0218(17) 
C24 0.058(3) 0.070(3) 0.048(2) -0.029(2) 0.0094(19) -0.031(2) 
C26 0.041(2) 0.039(2) 0.071(3) -0.009(2) 0.011(2) -0.0116(18) 
C27 0.071(3) 0.056(3) 0.040(2) -0.0179(19) 0.002(2) -0.031(2) 
  
_geom_special_details 
; 
 All esds (except the esd in the dihedral angle between two l.s. planes) 
 are estimated using the full covariance matrix.  The cell esds are taken 
 into account individually in the estimation of esds in distances, angles 
 and torsion angles; correlations between esds in cell parameters are only 
 used when they are defined by crystal symmetry.  An approximate (isotropic) 
 treatment of cell esds is used for estimating esds involving l.s. planes. 
; 
  
loop_ 
 _geom_bond_atom_site_label_1 
 _geom_bond_atom_site_label_2 
 _geom_bond_distance 
 _geom_bond_site_symmetry_2 
 _geom_bond_publ_flag 
Er1 N3 2.178(2) . ? 
Er1 N3 2.204(2) 2_676 ? 
Er1 N1 2.290(2) . ? 
Er1 N2 2.320(2) . ? 
Er1 O1 2.407(2) . ? 
K1 O5 2.734(3) 2_765 ? 
K1 O5 2.734(3) . ? 
K1 O2 2.772(2) . ? 
K1 O2 2.772(2) 2_765 ? 
K1 O4 2.7880(19) 2_765 ? 
K1 O4 2.7880(19) . ? 
K1 O3 2.820(2) . ? 
K1 O3 2.820(2) 2_765 ? 
Si1 N1 1.701(3) . ? 
Si1 C2 1.875(3) . ? 
Si1 C1 1.876(3) . ? 
Si1 C3 1.876(3) . ? 
Si2 N1 1.706(3) . ? 
Si2 C5 1.860(4) . ? 
Si2 C4 1.877(3) . ? 
Si2 C6 1.878(3) . ? 
Si3 N2 1.703(2) . ? 
Si3 C7 1.872(3) . ? 
Si3 C8 1.875(3) . ? 
Si3 C9 1.887(3) . ? 
Si4 N2 1.704(2) . ? 
Si4 C12 1.863(3) . ? 
Si4 C11 1.867(3) . ? 
Si4 C10 1.884(3) . ? 
O1 C13 1.406(9) . ? 
O1 C16 1.459(6) . ? 
O1 C13B 1.499(9) . ? 
O1 C16B 1.501(7) . ? 
O2 C18 1.417(4) . ? 
O2 C17 1.422(4) . ? 
O3 C19 1.424(4) . ? 
O3 C20 1.431(4) . ? 
O4 C22 1.420(4) . ? 
O4 C21 1.428(3) . ? 
O5 C23 1.426(4) . ? 
O5 C26 1.426(4) 2_765 ? 
O6 C30B 1.316(8) . ? 
O6 C27 1.403(5) . ? 
O6 C30 1.556(8) . ? 
N3 N3 1.409(4) 2_676 ? 
N3 Er1 2.204(2) 2_676 ? 
C17 C22 1.500(4) 2_765 ? 
C18 C19 1.495(5) . ? 
C20 C21 1.486(4) . ? 
C22 C17 1.500(4) 2_765 ? 
C15 C16B 1.405(8) . ? 
C15 C14 1.479(5) . ? 
C15 C16 1.568(7) . ? 
C15 C14B 1.65(2) . ? 
C23 C24 1.501(5) . ? 
C24 C25 1.471(8) 2_765 ? 
C24 C25B 1.582(8) 2_765 ? 
C26 C25B 1.379(9) . ? 
C26 O5 1.426(4) 2_765 ? 
C26 C25 1.579(9) . ? 
C27 C28 1.417(8) . ? 
C27 C28B 1.66(2) . ? 
C13 C14 1.615(9) . ? 
C25 C24 1.471(8) 2_765 ? 
C28 C29 1.483(11) . ? 
C29 C30 1.384(11) . ? 
C13B C14B 1.29(2) . ? 
C25B C24 1.582(8) 2_765 ? 
C28B C29B 1.50(3) . ? 
C29B C30B 1.461(16) . ? 
  
loop_ 
 _geom_angle_atom_site_label_1 
 _geom_angle_atom_site_label_2 
 _geom_angle_atom_site_label_3 
 _geom_angle 
 _geom_angle_site_symmetry_1 
 _geom_angle_site_symmetry_3 
 _geom_angle_publ_flag 
N3 Er1 N3 37.52(11) . 2_676 ? 
N3 Er1 N1 106.35(9) . . ? 
N3 Er1 N1 113.04(8) 2_676 . ? 
N3 Er1 N2 109.50(8) . . ? 
N3 Er1 N2 126.88(8) 2_676 . ? 
N1 Er1 N2 117.19(8) . . ? 
N3 Er1 O1 119.03(8) . . ? 
N3 Er1 O1 84.52(8) 2_676 . ? 
N1 Er1 O1 115.36(8) . . ? 
N2 Er1 O1 89.05(7) . . ? 
O5 K1 O5 180.0 2_765 . ? 
O5 K1 O2 99.93(7) 2_765 . ? 
O5 K1 O2 80.07(7) . . ? 
O5 K1 O2 80.07(7) 2_765 2_765 ? 
O5 K1 O2 99.93(7) . 2_765 ? 
O2 K1 O2 180.0 . 2_765 ? 
O5 K1 O4 81.44(7) 2_765 2_765 ? 
O5 K1 O4 98.56(7) . 2_765 ? 
O2 K1 O4 60.23(6) . 2_765 ? 
O2 K1 O4 119.77(6) 2_765 2_765 ? 
O5 K1 O4 98.56(7) 2_765 . ? 
O5 K1 O4 81.44(7) . . ? 
O2 K1 O4 119.77(6) . . ? 
O2 K1 O4 60.23(6) 2_765 . ? 
O4 K1 O4 180.0 2_765 . ? 
O5 K1 O3 97.46(7) 2_765 . ? 
O5 K1 O3 82.54(7) . . ? 
O2 K1 O3 60.98(6) . . ? 
O2 K1 O3 119.02(6) 2_765 . ? 
O4 K1 O3 119.95(6) 2_765 . ? 
O4 K1 O3 60.05(6) . . ? 
O5 K1 O3 82.54(7) 2_765 2_765 ? 
O5 K1 O3 97.46(7) . 2_765 ? 
O2 K1 O3 119.02(6) . 2_765 ? 
O2 K1 O3 60.98(6) 2_765 2_765 ? 
O4 K1 O3 60.05(6) 2_765 2_765 ? 
O4 K1 O3 119.95(6) . 2_765 ? 
O3 K1 O3 180.0 . 2_765 ? 
N1 Si1 C2 114.41(13) . . ? 
N1 Si1 C1 110.32(13) . . ? 
C2 Si1 C1 105.24(15) . . ? 
N1 Si1 C3 113.93(15) . . ? 
C2 Si1 C3 106.23(16) . . ? 
C1 Si1 C3 106.02(16) . . ? 
N1 Si2 C5 110.22(14) . . ? 
N1 Si2 C4 114.07(14) . . ? 
C5 Si2 C4 107.03(16) . . ? 
N1 Si2 C6 113.98(15) . . ? 
C5 Si2 C6 106.44(19) . . ? 
C4 Si2 C6 104.54(15) . . ? 
N2 Si3 C7 109.28(13) . . ? 
N2 Si3 C8 114.29(13) . . ? 
C7 Si3 C8 106.00(15) . . ? 
N2 Si3 C9 115.37(13) . . ? 
C7 Si3 C9 105.21(14) . . ? 
C8 Si3 C9 105.93(15) . . ? 
N2 Si4 C12 110.93(14) . . ? 
N2 Si4 C11 111.86(13) . . ? 
C12 Si4 C11 107.48(18) . . ? 
N2 Si4 C10 115.08(13) . . ? 
C12 Si4 C10 105.48(16) . . ? 
C11 Si4 C10 105.49(16) . . ? 
C13 O1 C16 104.8(5) . . ? 
C16 O1 C13B 108.3(4) . . ? 
C13 O1 C16B 105.9(5) . . ? 
C13B O1 C16B 105.4(4) . . ? 
C13 O1 Er1 130.5(4) . . ? 
C16 O1 Er1 124.2(3) . . ? 
C13B O1 Er1 124.6(3) . . ? 
C16B O1 Er1 117.9(3) . . ? 
C18 O2 C17 112.8(2) . . ? 
C18 O2 K1 115.36(17) . . ? 
C17 O2 K1 114.87(17) . . ? 
C19 O3 C20 111.4(2) . . ? 
C19 O3 K1 111.66(16) . . ? 
C20 O3 K1 113.59(17) . . ? 
C22 O4 C21 112.8(2) . . ? 
C22 O4 K1 115.70(17) . . ? 
C21 O4 K1 116.19(17) . . ? 
C23 O5 C26 106.6(3) . 2_765 ? 
C23 O5 K1 123.9(2) . . ? 
C26 O5 K1 103.4(2) 2_765 . ? 
C30B O6 C27 117.9(4) . . ? 
C27 O6 C30 100.3(4) . . ? 
Si1 N1 Si2 123.01(14) . . ? 
Si1 N1 Er1 113.55(12) . . ? 
Si2 N1 Er1 123.34(13) . . ? 
Si3 N2 Si4 123.29(14) . . ? 
Si3 N2 Er1 117.50(11) . . ? 
Si4 N2 Er1 118.95(12) . . ? 
N3 N3 Er1 72.24(18) 2_676 . ? 
N3 N3 Er1 70.23(17) 2_676 2_676 ? 
Er1 N3 Er1 142.48(11) . 2_676 ? 
O2 C17 C22 108.4(2) . 2_765 ? 
O2 C18 C19 109.1(3) . . ? 
O3 C19 C18 108.9(3) . . ? 
O3 C20 C21 108.6(2) . . ? 
O4 C21 C20 108.4(2) . . ? 
O4 C22 C17 107.8(2) . 2_765 ? 
C16B C15 C14 104.5(4) . . ? 
C14 C15 C16 107.4(3) . . ? 
C16B C15 C14B 103.2(8) . . ? 
C16 C15 C14B 96.9(8) . . ? 
O5 C23 C24 106.4(3) . . ? 
C25 C24 C23 108.0(4) 2_765 . ? 
C23 C24 C25B 97.7(4) . 2_765 ? 
C25B C26 O5 110.3(4) . 2_765 ? 
O5 C26 C25 103.7(4) 2_765 . ? 
C25B C26 K1 128.5(4) . . ? 
C25 C26 K1 101.7(4) . . ? 
O6 C27 C28 111.6(5) . . ? 
O6 C27 C28B 98.6(9) . . ? 
O1 C13 C14 101.5(5) . . ? 
C15 C14 C13 98.8(4) . . ? 
O1 C16 C15 103.0(4) . . ? 
C24 C25 C26 101.7(5) 2_765 . ? 
C27 C28 C29 101.9(6) . . ? 
C30 C29 C28 105.2(6) . . ? 
C29 C30 O6 108.7(6) . . ? 
C14B C13B O1 110.1(11) . . ? 
C13B C14B C15 107.1(15) . . ? 
C15 C16B O1 109.1(5) . . ? 
C26 C25B C24 105.9(5) . 2_765 ? 
C29B C28B C27 102.8(15) . . ? 
C30B C29B C28B 105.6(13) . . ? 
O6 C30B C29B 105.2(7) . . ? 
  
_diffrn_measured_fraction_theta_max    0.909 
_diffrn_reflns_theta_full              25.50 
_diffrn_measured_fraction_theta_full   0.996 
_refine_diff_density_max    0.666 
_refine_diff_density_min   -0.501 
_refine_diff_density_rms    0.091 

#===END
